# Supplementary material
Source: PubMed Central journal article supplement (PMC6410914)
Supplement: blood804401-suppl1.pdf [file blood804401-suppl1.pdf]

# ***Altered patterns of global protein synthesis and translational fidelity in RPS15-mutated chronic lymphocytic leukemia***

Gabriel Bretones, Miguel G. Álvarez, Javier R. Arango, David Rodríguez, Ferran Nadeu, Miguel A. Prado, Rafael Valdés-Mas, Diana A. Puente, Joao A. Paulo, Julio Delgado, Neus Villamor, Armando López-Guillermo, Daniel J. Finley, Steven P. Gygi, Elías Campo, Víctor Quesada and Carlos López-Otín

## ***Supplemental Data***

### ***Supplemental Methods***

#### **Culture media, buffers and reagents.**

I10F medium was composed of Iscove's Modified Dulbecco's Medium (IMDM, Gibco) supplemented with 10% (v/v) fetal bovine serum (FBS, Gibco). D10F medium was composed of Dubecco's Modified Eagle Medium (DMEM, Gibco) supplemented with 10% (v/v) fetal bovine serum (FBS, Gibco). Additionally, all media were supplemented with 1% (v/v) of 100X Antibiotic-Antimycotic (Gibco) and 1% (v/v) of 100X Penicillin-streptomycin-glutamine (Gibco). Transduced cells were selected with 10 µg/mL blasticidin S (Invitrogen) or 2 µg/mL puromycin (Sigma Aldrich) as indicated. 10 mg/mL cycloheximide (CHX, Sigma Aldrich), 100 mM actinomycin D (ACTD, Sigma Aldrich), 100 mM ibrutinib (Santa Cruz, sc-483194), 10 mM sorafenib (Santa Cruz, sc-220125) and 10 mM fludarabine (Santa Cruz, sc-204755) stock solutions were prepared in dimethyl sulfoxide (DMSO, Sigma-Aldrich). 100 µM bortezomib (Santa Cruz Biotechnology) stock solution was prepared in 1X PBS. Stock solutions were directly added to the culture medium to obtain the final working concentrations. An equal volume of drug solvent (PBS or DMSO) was added to the control cells. For the immunoblotting experiments, the NP-40 lysis buffer contained 50 mM Tris-HCl pH 7.4, 150 mM NaCl, 10mM EDTA pH 8, and 1% (v/v) NP-40 (Sigma Aldrich). NP-40 lysis buffer was supplemented with complete protease inhibitor cocktail (Roche), as well as 20 mM NaF (Merck) and PhosSTOP

phosphatases inhibitor cocktail (Roche) before use. For SDS-PAGE, protein samples were mixed with 4X SDS-PAGE loading buffer containing 200 mM Tris HCl pH 6.8, 8% (w/v) sodium dodecyl sulfate (SDS), bromophenol blue (1 mg/mL), 40% (v/v) glycerol and 2% (v/v)  $\beta$ -mercaptoethanol (all from Sigma-Aldrich). TBST buffer contained 20 mM Tris-HCl pH 7.4, 150 mM NaCl and 0.05% (v/v) Tween-20 (Sigma-Aldrich). For Ribosome isolation experiments, the ribosome homogenization buffer contained 50 mM Tris-HCl, pH 7.5, 5 mM MgCl<sub>2</sub>, 25 mM KCl, 0.25% (v/v) Triton X-100 and 0.2 M sucrose, and the sucrose cushion buffer was composed of 50 mM Tris-HCl, pH 7.5, 5 mM MgCl<sub>2</sub>, 25 mM KCl, and 2 M sucrose. For immunoprecipitations, the Co-IP lysis buffer contained 50 mM Tris-HCl pH 8, 150 mM NaCl, 1.5 mM MgCl<sub>2</sub>, 5 mM EDTA, 1 mM DTT, 1% (v/v) NP-40 and was supplemented with protease inhibitor cocktail (Roche) before use. The Co-IP washing buffer was composed of 50 mM Tris-HCl pH 8, 150 mM NaCl, 1.5 mM MgCl<sub>2</sub>, 5 mM EDTA, 1 mM DTT and 0.1% (v/v) NP-40. For fluorescence microscopy and immunofluorescence experiments, cells were fixed in 4% PFA-solution containing 4% (v/v) formaldehyde (Merck) in 1X PBS, and stained with 1 $\mu$ g/mL pyronin Y (Sigma Aldrich) in 1X PBS.

### **DNA constructs and site-directed mutagenesis.**

Full-length RPS15 transcript variant 1, and RPS15 variants P131S and S138F, cloned with an in-frame N-terminal DYKDDDDK tag in the pUC57 vector, were purchased from GeneScript. RPS15<sup>wt</sup>, RPS15<sup>P131S</sup> and RPS15<sup>S138F</sup> were subcloned into a custom modified pEGFP-C3 vector (Clontech) to generate GFP-RPS15 constructs. Finally, GFP-RPS15 constructs were subcloned into pCDH-CMV-MCS-EF1-Puro lentiviral vector (Addgene) in which puromycin resistance was replaced with blasticidin resistance. pCDH-CMV-GFP-RPS15<sup>G132S</sup>-EF1-Blast, pCDH-CMV-GFP-RPS15<sup>G134R</sup>-EF1-Blast, pCDH-CMV-GFP-RPS15<sup>T136A</sup>-EF1-Blast, pCDH-CMV-GFP-RPS15<sup>H137Y</sup>-EF1-Blast, pCDH-CMV-GFP-RPS15<sup>S139F</sup>-EF1-Blast and pCDH-CMV-GFP-RPS15<sup>K145N</sup>-EF1-Blast lentiviral vectors were generated by site-directed mutagenesis of pCDH-CMV-GFP-RPS15<sup>WT</sup>-EF1-Blast vector using the QuickChange XL site-directed mutagenesis kit (Stratagene) and the following oligonucleotides: 5'-GCATGGCCGGCCAGCATCGGG GCCAC-3' and 5'-GTGGCCCCGATGCTGGGCCGGCCATGC-3' for the G132S variant; 5'-CCGGCCCCGGCATCAGGGCCACCCACTC-3' and 5'-GAGTGGGTGGCC CTGATGCCGGGCCGG-3' for the G134R variant; 5'-CGGCATCGGGGCCGCCCA CTCCTCCCG-3' and 5'-CGGGAGGAGTGGGCGGCCCCGATGCCG-3' for the T136A variant; 5'-CATCGGGGCCACCTACTCCTCCCGCTTC-3' and 5'-GAAGCGGGAGGA

GTAGGTGGCCCCGATG-3' for the H137Y variant; 5'-GGCCACCCACTCCTTCC GCTTCATCCCTCTC-3' and 5'-GAGAGGGATGAAGCGGAAGGAGTGGGTGGCC-3' for S139F variant; and 5'-GCTTCATCCCTCTCAATTA~~A~~CTCGAGGATCCGC-3' and 5'-GCGGATCCTCGAGTTAATTGAGAGGGATGAAGC-3' for the K145N variant. The bicistronic reporter pCDNA3-RLuc-POLIRES-FLuc containing the poliovirus (POL) internal ribosome entry site (IRES) controlling the Firefly luciferase gene (FLuc) to monitor cap-independent translation, and the CMV promoter controlling the Renilla luciferase gene (RLuc) to monitor the cap-dependent translation, which have been previously described<sup>1</sup>, were purchased from Addgene (Plasmid #45642). The pCI-6.20 vector expressing FLuc and RLuc fused by the short peptide P2A from porcine teschovirus-1 polyprotein, which has been previously described<sup>2</sup>, was purchased from Addgene (Plasmid #41002). During the elongation, eukaryotic ribosomes fail to insert a peptide bond between the Gly and Pro residues of P2A yielding two separate polypeptides<sup>3</sup>. In addition, pCI.6.20-FLuc-K529N-A>**T/C** (AAA>AAT/**C**) vectors were generated by site-directed mutagenesis of pCI6.20 vector using the QuickChange XL site-directed mutagenesis kit (Stratagene) and the oligonucleotides 5'-GAAAGGTCTT ACCGGAAAT/**C**CTCGACGCAAGAAAATC-3' and 5'-GATTTTTCTTGCCTCGAGA/**G** TTTCCGGTAAGACCTTTC-3'. These plasmids carry the K529N variant which renders the firefly enzyme catalytically inactive<sup>4-6</sup>. Thus, ribosomes with a reduced ability to discriminate between cognate and near-cognate aminoacyl-tRNAs yield higher levels of firefly luminescence. pCI-6.20-RFfusion vector was generated by replacing P2A (EFGSGATNFSLLKQAGDVEENPGP) by the EFETGYRL fusion peptide in between the Firefly and Renilla genes of pCI-6.20 vector. Thus, we inserted in between EcoRI and BstBI restriction sites the hybridized oligonucleotides 5'-AATTCGAGACGGGATACCGT CTCATGACTT-3' and 5'-CGAAGTCATGAGACGGTATCCCGTCTCG-3', generating two new repeated and inverted BsmBI restriction sites. pCI-6.20-STOP1, pCI-6.20-STOP2 and pCI-6.20-STOP3 constructs were generated by inserting 5'-AATTCGAGAC GGGATA**A**CGTCTCA-3' and 5'-GTCATGAGACGTTATCCCGTCTCG-3', 5'-AATTCG AGACGGGATAG**C**GTCTCA-3' and 5'-GTCATGAGACG**C**TATCCCGTCTCG-3 or 5'-AATTCGAGACGGGAT**G**ACGTCTCA-3' and 5'-GTCATGAGACG**T**CATCCCGTCTCG-3' hybridized oligonucleotides, respectively, in between BsmBI restriction sites of the pCI-6.20-RFfusion vector. The LentiCRISPRv2, previously described<sup>7</sup>, was purchased from Addgene (Plasmid #52961). LentiCRISPR-sgEMPTY(∅) and LentiCRISPR-sgRNA-RPS15 vectors were generated by inserting 5'-CACCGGAGACGG GATACCGTCTCT-3' and 5'-AAACAGAGACGGTATCCCGTCTCC-3', or 5'-CACCGG CTGCATCAGCTGCTCGCTG-3' and 5'-AAACCAGCGAGCAGCTGATGCAGCC-3' hybridized oligonucleotides, respectively, in between BsmBI restriction sites of the

LentiCRISPRv2 vector. Lentiviral packaging plasmids psPAX2 (Plasmid #12260) and pMD2.G (Plasmid #12259) were purchased from Addgene. All constructs were sequenced and validated before experimental use.

### **Lentiviral preparation and transduction**

Lentiviral vectors were transfected into HEK293T cells along with packaging plasmids psPAX2 and pMD2.G. 48 h post-transfection, supernatants were collected, filtered through a 0.45  $\mu\text{m}$  filter, precipitated overnight with 1 volume of PEG-solution (20% Polyethylene glycol (PEG)-4000 in PBS) and concentrated by centrifugation at 4000 rpm. Virus titer was determined by transducing HEK293T cells with serial dilutions of concentrated viruses and visually assessing the percentage of GFP-expressing or antibiotic resistant cells. Cells were infected with the desired titer for 24 h with 0.8  $\mu\text{g}/\text{mL}$  polybrene (Santa Cruz Biotechnology).

### **Proliferation and viability assays**

For proliferation assays, three independent clones obtained from HEK293T cells stably expressing the different GFP-RPS15 constructs and transduced with the lentiCRISPRv2-empty ( $\emptyset$ ) vector or the lentiCRISPRv2-sgRNA against endogenous *RPS15* locus were seeded into 96-well plates at a density of 10000 cells per well. Proliferation was monitored every day by measuring the conversion of a tetrazolium salt into formazan in metabolically active cells using the Cell Titer 96 Non-Radioactive proliferation kit (Promega). Formazan absorbance was measured at 570nm with a Varioskan Flash microplate reader (Thermo Scientific).

For viability assays, three independent HEK293T clones with partially or totally ablated endogenous *RPS15* were seeded into 96-well plates at a density of 20000 cells per well and treated with the indicated concentrations of ibrutinib (0-62,5  $\mu\text{M}$ ), sorafenib (0-62,5  $\mu\text{M}$ ) or fludarabine (0-512  $\mu\text{M}$ ) for 72 h in 96-well plates. Viability rates were measured with the Cell Titer 96 Non-Radioactive proliferation kit (Promega), in a Varioskan Flash microplate reader (Thermo Scientific) following the manufacturer's instructions. For the half maximal inhibitory concentration (IC<sub>50</sub>) determination, normalized absorbance values were fitted to a curve using the [Inhibitor] vs. normalized response (variable slope) non-linear regression equation and the least squares fitting method with GraphPad Prism 7.0 software.

## **Immunofluorescence microscopy analysis**

HEK293T cells were fixed with a 4% PFA-solution, permeabilized with PBS-containing 0.5% Triton X-100 and blocked with PBS-containing 15% goat serum (Gibco), followed by an overnight incubation with rabbit anti-RPS15 or mouse anti-FLAG antibodies. Immunofluorescence was detected using Alexa Fluor 546 anti-rabbit or anti-mouse secondary antibodies (Invitrogen), respectively. For pyronin Y (PY) staining, coverslips were incubated with 1 µg/mL PY (Sigma Aldrich) in PBS for 5 min at room temperature and washed 3 times with 1%-PBS before mounting. The coverslips were mounted on slides using 4',6-diamidino-2-phenylindole (DAPI)-containing Vectashield ProLong Gold antifade reagent (Invitrogen), and imaged in an Axiovert 200M microscope (Zeiss) equipped with 100X and 63X Plan-Apochromat objectives, an HBO mercury lamp and different fluorescent filter Sets for GFP, DAPI or Alexa Fluor 546 fluorescent dyes. 100X images were captured using an AxioCam MRm digital CCD camera and processed with the Zeiss AxioVision 4.7 software.

## **Library preparation and deep-targeted next generation sequencing (NGS)**

Libraries were generated using the Access-Array system (Fluidigm) and sequenced in a MiSeq equipment (Illumina). Through this approach, the average sequencing coverage across the target region was 1715x (1764x and 1617x for exons 3 and 4, respectively), with 63% of the samples having >75% of the sequence at >100x. After bioinformatic analysis, synonymous variants and polymorphisms described in dbSNP142 with a European population frequency >1% (1000 Genomes Project database) were removed. Variants passing the preceding filter were considered somatic when they were truncating or annotated as such in COSMIC (v77, <http://cancer.sanger.ac.uk/cosmic>) or in our custom CLL database<sup>8</sup>. Variants not satisfying any of the previous criteria were analyzed in the germ line DNA of the patient. Among the somatic mutations reported in the validation cohort, all but two were verified by allele-specific PCR using the 5'-CCCGC TTCATCCCTCTCA/T-3' as wild type/mutated forward primer and 5'-GGAGATGAGG GAAGCCAGAA-3' as reverse primer or by a second independent round of NGS. The two mutations in which the verification step was not performed were present at high variant allele frequencies (VAF of 25% and 41%).

## Bioinformatic workflow applied to the extended cohort.

The bioinformatic analysis was performed as previously described<sup>9</sup>. Briefly, raw reads were trimmed using Trimmomatic (v0.32)<sup>10</sup> and the specific primers removed using Flexbar (v2.5)<sup>11</sup>. Trimmed reads were mapped to the reference genome (GRCh37/hg19) using the Burrows-Wheeler Aligner–MEM algorithm (v0.7.10)<sup>12</sup>. GATK<sup>13</sup> base quality score recalibration and indel realignment was performed before variant calling by VarScan2 (v2.3.7)<sup>14</sup>, HaplotypeCaller and UnifiedGenotyper (GATK, v3.3-0)<sup>15,16</sup>. In addition, the pipeline established on the MiSeq Reporter software (v2.4.60) was run in parallel. Variants identified were combined and annotated using ANNOVAR (v2016Feb01)<sup>17</sup>. All programs were executed following the authors' recommendations.

## Mass spectrometry analysis

HEK293T cells stably expressing GFP-RPS15<sup>WT</sup> (2 clones), GFP-RPS15<sup>P131S</sup> (2 clones) and GFP-RPS15<sup>S138F</sup> (4 independent clones) in which we had partially (GFP-RPS15<sup>S138F</sup>) or totally ablated endogenous *RPS15*, or MEC1 cells stably expressing GFP-RPS15<sup>WT</sup>, GFP-RPS15<sup>P131S</sup>, GFP-RPS15<sup>G132S</sup>, GFP-RPS15<sup>T136A</sup>, GFP-RPS15<sup>H137Y</sup> and GFP-RPS15<sup>S138F</sup> (3 independent clones per variant), were lysed in 8 M urea buffer (8 M urea, 50 mM EPPS pH 8.0, 75 mM NaCl, protease and phosphatase inhibitors [Roche]) and protein content was quantified by BCA. Then, disulfide bonds were reduced with 5 mM TCEP for 30 min, alkylated with 14 mM iodoacetamide for 30 min in the dark, and finally quenched with 10 mM DTT for 15 min. 200 µg of protein were precipitated with methanol/chloroform, resuspended in 200 mM EPPS pH 8.5, and digested overnight at room temperature with LysC (1:100, LysC:protein). The day after, trypsin was added (1:75, trypsin:protein) and incubated 5 extra hours at 37 °C. After digestion, peptide concentration was calculated using the quantitative colorimetric peptide assay (Pierce) and 25 µg of peptides were labeled with the TMT-10 plex reagents (Pierce) as described previously<sup>18</sup>. A peptide pool (bridge sample) from all 8 (HEK293T clones) or 18 (MEC1 clones) samples was also made by adding an equal amount of each one, and labeled with the last TMT tag (131 m/z). Equal amounts of labeled peptides were combined (10 samples per TMT) and fractionated in a basic pH reverse phase chromatography. All 96 fractions collected were combined into 24, 12 of which were desalted via StageTip and dried down in a SpeedVac. Finally, cleaned peptides were dissolved in 3% formic acid and 3% acetonitrile (ACN), and separated by reversed phase chromatography using a C18 (Accucore 150 2.6 µm) column mounted in a Proxeon EASY-nLC 1000 LC pump (Thermo Fisher) coupled to an Orbitrap Fusion mass spectrometer (Thermo Fisher) in a

SPS-MS3 mode<sup>19</sup>. In the mass spectrometer, MS1 spectra were detected in the Orbitrap (mass range: 350-1400 m/z, 120k resolution, maximum injection time of 100 ms, automatic gain control (AGC)  $5 \times 10^5$ ). Precursors for MS2/MS3 analysis were selected using a TopSpeed of 2 seconds, isolated in the quadrupole with an isolation window of 0.7 m/z, fragmented by CID (normalized collision energy, NCE, of 35%) and detected in the ion trap (AGC  $2 \times 10^4$ , maximum injection time 150 ms). For TMT quantification, the synchronous-precursor-selection (SPS)-MS3 method was used, where the 10 most intense fragments ions of each MS2, were further isolated, fragmented by HCD (NCE of 65%), and detected in the Orbitrap (50k of resolution, maximum injection time of 250 ms, AGC of  $2 \times 10^5$ ). All raw files obtained from the mass spectrometer were analyzed using in-house software<sup>20</sup> based on SEQUEST. All searches were performed against the human Uniprot database (February 2014), including the decoy reverse database and the most common contaminants. Precursor and product ion tolerances were set up to 20 ppm and 0.9 Da respectively. Carbamidomethylation of cysteines (+57.0215 Da) and TMT labeling (+229.1629 Da) on lysines and peptide N-termini were included as static modifications, and methionine oxidation (+15.9949 Da) as a variable modification. Peptide-spectrum matches (PSMs) were adjusted to a 1% false discovery rate (FDR)<sup>21,22</sup> using a linear discriminant analysis<sup>20</sup>. Moreover, proteins were further collapsed to a final protein-level FDR of 1% and assembled by principles of parsimony to produce the smallest set of proteins necessary to account for all observed peptides. Relative quantification values of each peptide were obtained by subtracting the intensities of the TMT report ions from the MS3 spectra. Only those peptides with a summed signal-to-noise ratio higher than 100 were used for protein quantification. Finally, quantifications were normalized assuming equal protein loading for all ten samples (per TMT) and exported for further analysis in Microsoft Excel and GraphPad Prism 7.0 software. To determine the number of proteins changed as a result of *RPS15* mutations, multiple t-test analyses were performed for each protein across the dataset and corrected for multiple testing using the Bonferroni-Dunn method (adjusted  $P < 0.05$ ). Among these, a ratio change threshold of 1.5-fold in protein abundance with respect to GFP-*RPS15*<sup>WT</sup>-expressing cells was additionally established. Unsupervised hierarchical clustering, heat maps and principal component analysis were generated with Perseus (<http://www.coxdocs.org/doku.php?id=perseus:start>)<sup>23</sup>. All mass spectrometry proteomics data have been deposited in the ProteomeXchange Consortium via the PRIDE partner repository<sup>24</sup> with the dataset identifier (requested, pending to be received).

## Gene set enrichment analysis

To determine possible altered pathways from proteomic data-sets, we performed standard Gene Set Enrichment Analysis (GSEA)<sup>25</sup> using GSEA v3.0 and the gene sets derived from the Reactome database, included within the collection C2 of the Molecular Signatures Database v6.0 (MSigDB v6.0) (<http://software.broadinstitute.org/gsea/index.jsp>). We used signal-to-noise correlation as the ranking metric and 1000 permutations of gene set to estimate significance. The maximum gene set size was set to 500 genes and the minimum gene set size was set to 15 genes. Selected enriched pathways had a relaxed FDR of  $<0.25$  and  $P<0.01$ . Selected enriched gene-sets were analyzed later with the leading edge analysis tool to find the shared subset of up- or down- regulated proteins and to define the main altered biological signatures.

## Statistical analysis

Student's t-tests, multiple t-test and one- and two-way ANOVA, were performed using GraphPad Prism 7.0 software. Differences were considered statistically significant when  $P<0.05$  ( $*P<0.033$ ,  $**P<0.002$ ,  $***P<0.001$ ). The prognostic impact of *RPS15* mutations was evaluated for time to first treatment (TTFT) from the time of sampling, considering disease-unrelated deaths as competing events. Gray's test was used for comparing the cumulative incidence curves of TTFT, while the Fine-Gray multivariate regression model with Backward-stepwise elimination was applied to test the independent prognostic value of *RPS15* mutations on TTFT when considering the IGHV mutational status, genomic aberrations (tri12, del(13q), del(11q), del(17p)/*TP53* mutation), and Binet stage of the patients. Clinical analyses were performed using R (v3.2.4). Results were considered statistically significant when  $P<0.05$  ( $*P<0.05$ ,  $**P<0.01$ ,  $***P<0.001$ ).

---



## Supplemental References

1. Poulin F, Gingras AC, Olsen H, Chevalier S, Sonenberg N. 4E-BP3, a new member of the eukaryotic initiation factor 4E-binding protein family. *J Biol Chem*. 1998;273(22):14002-14007.
2. Cheng KC, Inglese J. A coincidence reporter-gene system for high-throughput screening. *Nat Methods*. 2012;9(10):937.
3. Kim JH, Lee SR, Li LH, et al. High cleavage efficiency of a 2A peptide derived from porcine teschovirus-1 in human cell lines, zebrafish and mice. *PLoS One*. 2011;6(4):e18556.
4. Salas-Marco J, Bedwell DM. Discrimination between defects in elongation fidelity and termination efficiency provides mechanistic insights into translational readthrough. *J Mol Biol*. 2005;348(4):801-815.
5. Kramer EB, Farabaugh PJ. The frequency of translational misreading errors in *E. coli* is largely determined by tRNA competition. *RNA*. 2007;13(1):87-96.
6. Branchini BR, Murtiashaw MH, Magyar RA, Anderson SM. The role of lysine 529, a conserved residue of the acyl-adenylate-forming enzyme superfamily, in firefly luciferase. *Biochemistry*. 2000;39(18):5433-5440.
7. Sanjana NE, Shalem O, Zhang F. Improved vectors and genome-wide libraries for CRISPR screening. *Nat Methods*. 2014;11(8):783-784.
8. Puente XS, Bea S, Valdes-Mas R, et al. Non-coding recurrent mutations in chronic lymphocytic leukaemia. *Nature*. 2015;526(7574):519-524.
9. Nadeu F, Delgado J, Royo C, et al. Clinical impact of clonal and subclonal TP53, SF3B1, BIRC3, NOTCH1, and ATM mutations in chronic lymphocytic leukemia. *Blood*. 2016;127(17):2122-2130.
10. Bolger AM, Lohse M, Usadel B. Trimmomatic: a flexible trimmer for Illumina sequence data. *Bioinformatics*. 2014;30(15):2114-2120.
11. Dodt M, Roehr JT, Ahmed R, Dieterich C. FLEXBAR-Flexible Barcode and Adapter Processing for Next-Generation Sequencing Platforms. *Biology (Basel)*. 2012;1(3):895-905.
12. Li H, Durbin R. Fast and accurate short read alignment with Burrows-Wheeler transform. *Bioinformatics*. 2009;25(14):1754-1760.

13. McKenna A, Hanna M, Banks E, et al. The Genome Analysis Toolkit: a MapReduce framework for analyzing next-generation DNA sequencing data. *Genome Res.* 2010;20(9):1297-1303.
14. Koboldt DC, Zhang Q, Larson DE, et al. VarScan 2: somatic mutation and copy number alteration discovery in cancer by exome sequencing. *Genome Res.* 2012;22(3):568-576.
15. Van der Auwera GA, Carneiro MO, Hartl C, et al. From FastQ data to high confidence variant calls: the Genome Analysis Toolkit best practices pipeline. *Curr Protoc Bioinformatics.* 2013;43:11 10 11-33.
16. DePristo MA, Banks E, Poplin R, et al. A framework for variation discovery and genotyping using next-generation DNA sequencing data. *Nat Genet.* 2011;43(5):491-498.
17. Wang K, Li M, Hakonarson H. ANNOVAR: functional annotation of genetic variants from high-throughput sequencing data. *Nucleic Acids Res.* 2010;38(16):e164.
18. Paulo JA, O'Connell JD, Gygi SP. A Triple Knockout (TKO) Proteomics Standard for Diagnosing Ion Interference in Isobaric Labeling Experiments. *J Am Soc Mass Spectrom.* 2016;27(10):1620-1625.
19. McAlister GC, Nusinow DP, Jedrychowski MP, et al. MultiNotch MS3 enables accurate, sensitive, and multiplexed detection of differential expression across cancer cell line proteomes. *Anal Chem.* 2014;86(14):7150-7158.
20. Huttlin EL, Jedrychowski MP, Elias JE, et al. A tissue-specific atlas of mouse protein phosphorylation and expression. *Cell.* 2010;143(7):1174-1189.
21. Elias JE, Gygi SP. Target-decoy search strategy for increased confidence in large-scale protein identifications by mass spectrometry. *Nat Methods.* 2007;4(3):207-214.
22. Elias JE, Gygi SP. Target-decoy search strategy for mass spectrometry-based proteomics. *Methods Mol Biol.* 2010;604:55-71.
23. Tyanova S, Temu T, Sinitcyn P, et al. The Perseus computational platform for comprehensive analysis of (prote)omics data. *Nat Methods.* 2016;13(9):731-740.
24. Vizcaino JA, Csordas A, del-Toro N, et al. 2016 update of the PRIDE database and its related tools. *Nucleic Acids Res.* 2016;44(D1):D447-456.

25. Subramanian A, Tamayo P, Mootha VK, et al. Gene set enrichment analysis: a knowledge-based approach for interpreting genome-wide expression profiles. *Proc Natl Acad Sci U S A*. 2005;102(43):15545-15550.

**Supplemental Table 1:** Primer pairs used in this work. Chr, chromosome; bp, base pairs; dpt-NGS, deep-targeted next generation sequencing; AS-PCR, Allele specific polymerase chain reaction; qPCR, quantitative PCR; RT-qPCR, reverse transcription quantitative PCR.

| Target gene                  | Target region | Chr | Start position (hg19) | End position (hg19) | Forward primer (5' → 3') | Reverse specific primer (5' → 3') | Amplicon length (bp) | Technique        |
|------------------------------|---------------|-----|-----------------------|---------------------|--------------------------|-----------------------------------|----------------------|------------------|
| <i>RPS15</i>                 | Exon 3        | 19  | 1439931               | 1440129             | ACCAAGCCTTAGTTCTCTGTCC   | CGCCTCCTTCTTGGCCTTG               | 199                  | dpt-NGS          |
| <i>RPS15</i>                 | Exon 3        | 19  | 1440079               | 1440259             | CGGAAGCAGCACTCCCTG       | CACACACCTTGATCTCCACCT             | 181                  | dpt-NGS          |
| <i>RPS15</i>                 | Exon 3        | 19  | 1440162               | 1440343             | GCACCTGCGGGACATGA        | GGGAGACCAAGAGCAAAGCTG             | 182                  | dpt-NGS          |
| <i>RPS15</i>                 | Exon 4        | 19  | 1440285               | 1440467             | GCTGGGGTTCGCCTGAT        | GAGCCATTACTTGAGAGGGATGA           | 183                  | dpt-NGS          |
| <i>RPS15</i>                 | Exon 4        | 19  | 1440373               | 1440571             | GCGAGTTCTCCATCACCTACAAG  | CTCACACCACGAACCTGAAGC             | 199                  | dpt-NGS          |
| <i>RPS15</i>                 | Exon 4        | 19  | 1440439               | 1440894             | CCCGCTTCATCCCTCTCA       | GGAGATGAGGGAAGCCAGAA              | 456                  | AS-PCR           |
| <i>RPS15<sup>K145*</sup></i> | Exon 4        | 19  | 1440439               | 1440894             | CCCGCTTCATCCCTCTCT       | GGAGATGAGGGAAGCCAGAA              | 456                  | AS-PCR           |
| <i>ACTB</i>                  | Exon 5        | 7   | 5567668               | 5567829             | ATTTCCCTCTCAGGCATGG      | GATCTCCTTCTGCATCCTGTC             | 162                  | qPCR             |
| <i>ACTB</i>                  | Exon1-2       | 7   | 5569264               | 5570204             | CACAGAGCCTCGCCTTTGCCGAT  | CGAGCGCGGCGATATCATCATCC           | 81                   | RT-qPCR          |
| <i>EGFP</i>                  | Vector        | -   | -                     | -                   | AACCACTACCTGAGCACCCA     | CTTGTACAGCTCGTCCATGC              | 123                  | RT-qPCR and qPCR |

**Supplemental Table 2:** Antibodies used in this work. IB, immunoblotting; IF, immunofluorescence; IP, immunoprecipitation.

| <b>Antibody</b>                           | <b>Specie and type</b> | <b>Technique and use dilution</b>                   | <b>Reference</b>                      |
|-------------------------------------------|------------------------|-----------------------------------------------------|---------------------------------------|
| <b>Anti-<math>\beta</math>-actin</b>      | Mouse monoclonal       | IB $\rightarrow$ 1:2000                             | Sigma (A5441)                         |
| <b>Anti-EF2</b>                           | Rabbit polyclonal      | IB $\rightarrow$ 1:1000                             | Santa Cruz Biotechnology (SC-25634)   |
| <b>Anti-Flag</b>                          | Mouse monoclonal       | IB $\rightarrow$ 1:1000; IF $\rightarrow$ 1:100     | Sigma( F1804)                         |
| <b>Anti-GAPDH</b>                         | Rabbit polyclonal      | IB $\rightarrow$ 1:1000                             | Santa Cruz Biotechnology (SC-25778)   |
| <b>Anti-GFP</b>                           | Rabbit polyclonal      | IB $\rightarrow$ 1:500                              | Santa Cruz Biotechnology (SC-8334)    |
| <b>Anti-GFP</b>                           | Rabbit polyclonal      | IB $\rightarrow$ 1:1000; IP $\rightarrow$ 2 $\mu$ g | Clontech Laboratories, Inc. (#632592) |
| <b>Anti-HA</b>                            | Rat monoclonal         | IB $\rightarrow$ 1:500                              | Roche (3F10)                          |
| <b>Anti-PolyUbiquitin</b>                 | Mouse monoclonal       | IB $\rightarrow$ 1:1000                             | Enzo life sciencies (BML-PW8805)      |
| <b>Anti-RPL11</b>                         | Rabbit monoclonal      | IB $\rightarrow$ 1:1000                             | Cell Signalling (#14382)              |
| <b>Anti-RPS15</b>                         | Rabbit monoclonal      | IB $\rightarrow$ 1:1000; IF $\rightarrow$ 1:100     | Abcam (ab 157193)                     |
| <b>Anti-RPS6</b>                          | Mouse monoclonal       | IB $\rightarrow$ 1:1000                             | Cell Signalling (#2317)               |
| <b>IRDye 680RD secondary antibody</b>     | Goat anti mouse        | IB $\rightarrow$ 1:10000                            | Li-COR (926-68070)                    |
| <b>IRDye 680RD secondary antibody</b>     | Goat anti rabbit       | IB $\rightarrow$ 1:10000                            | Li-COR (926-68071)                    |
| <b>IRDye 680RD secondary antibody</b>     | Goat anti rat          | IB $\rightarrow$ 1:10000                            | Li-COR (926-68076)                    |
| <b>IRDye 800CW secondary antibody</b>     | Goat anti mouse        | IB $\rightarrow$ 1:10000                            | Li-COR (926-32210)                    |
| <b>IRDye 800CW secondary antibody</b>     | Goat anti rabbit       | IB $\rightarrow$ 1:10000                            | Li-COR (926-32211)                    |
| <b>Alexa Fluor 546 secondary antibody</b> | Goat anti rabbit       | IF $\rightarrow$ 1:500                              | Invitrogen (#A-11035)                 |

**Supplemental Table 3:** *RPS15* mutations in the validation cohort of 216 previously untreated CLL patients analyzed by deep-targeted NGS. Ref, reference; Var, variant; VAF, variant allele frequency.

| Case | Gene         | Somatic criteria <sup>a</sup>               | Chr   | Genomic position (hg19) | Transcript | Exon | Ref | Var | cDNA    | Amino acid | VAF   | Mutation type | Verification <sup>b</sup> |
|------|--------------|---------------------------------------------|-------|-------------------------|------------|------|-----|-----|---------|------------|-------|---------------|---------------------------|
| 108  | <i>RPS15</i> | Somatic by NGS                              | chr19 | 1440429                 | NM_001018  | 4    | A   | G   | c.A406G | p.T136A    | 24.88 | Missense      | NGS                       |
| 108  | <i>RPS15</i> | Somatic by NGS                              | chr19 | 1440432                 | NM_001018  | 4    | C   | T   | c.C409T | p.H137Y    | 9.34  | Missense      | NGS                       |
| 198  | <i>RPS15</i> | Somatic by NGS                              | chr19 | 1440429                 | NM_001018  | 4    | A   | G   | c.A406G | p.T136A    | 49.61 | Missense      | NGS                       |
| 364  | <i>RPS15</i> | Somatic in COSMICv77 and in custom database | chr19 | 1440436                 | NM_001018  | 4    | C   | T   | c.C413T | p.S138F    | 1.09  | Missense      | NGS                       |
| 521  | <i>RPS15</i> | Somatic by NGS                              | chr19 | 1440415                 | NM_001018  | 4    | C   | G   | c.C392G | p.P131R    | 24.67 | Missense      | Not done                  |
| 605  | <i>RPS15</i> | Truncating                                  | chr19 | 1440456                 | NM_001018  | 4    | A   | T   | c.A433T | p.K145*    | 43.30 | Nonsense      | AS-PCR                    |
| 1357 | <i>RPS15</i> | Somatic by NGS                              | chr19 | 1440426                 | NM_001018  | 4    | G   | A   | c.G403A | p.A135T    | 22.61 | Missense      | NGS                       |
| 1381 | <i>RPS15</i> | Truncating                                  | chr19 | 1440456                 | NM_001018  | 4    | A   | T   | c.A433T | p.K145*    | 20.96 | Nonsense      | AS-PCR                    |
| 1460 | <i>RPS15</i> | Somatic by NGS                              | chr19 | 1440456                 | NM_001018  | 4    | A   | C   | c.A433C | p.K145Q    | 40.89 | Missense      | Not done                  |

<sup>a</sup>Somatic in COSMICv77, confirmed somatic in at least one sample in COSMIC v77 database; Custom database, confirmed somatic in at least one sample in our custom WGS/WES CLL database; Somatic by NGS, confirmed somatic by targeted-NGS of the normal DNA. Truncating, truncating mutations (frameshift indel, nonsense, or affecting a splice site) were considered somatic.

<sup>b</sup>NGS, verification of the mutation by a second independent round of NGS; AS-PCR, verification done by allele-specific (AS)-PCR; Not done, verification step not performed. Verification not performed in some mutations present at high variant allele frequency (VAF).

**Supplemental Table 4:** Clinical characteristics of patients with and without *RPS15* mutations.

| Parameter                                       | Category                      | CLL with unmutated <i>RPS15</i> (n=656) | CLL with mutated <i>RPS15</i> (n=12) | P-Value |
|-------------------------------------------------|-------------------------------|-----------------------------------------|--------------------------------------|---------|
| Gender                                          | % male/female                 | 59/41                                   | 58/42                                | 1       |
| Age (years)                                     | Median (range)                | 67 (19-94)                              | 66 (47-74)                           | 0.170   |
| Binet stage <sup>a</sup>                        | A                             | 439                                     | 7                                    | 1       |
|                                                 | B                             | 130                                     | 3                                    |         |
|                                                 | C                             | 54                                      | 0                                    |         |
|                                                 | Unknown                       | 33                                      | 2                                    |         |
| IGHV mutational status <sup>b</sup>             | Unmutated                     | 249                                     | 11                                   | <0.001  |
|                                                 | Mutated                       | 377                                     | 0                                    |         |
|                                                 | Unknown                       | 30                                      | 1                                    |         |
| Copy number alterations                         | Trisomy 12                    | 97/628 (15.4%)                          | 1/10 (10%)                           | 1       |
|                                                 | Deletion 13q                  | 298/628 (47.5%)                         | 3/10 (30%)                           | 0.348   |
|                                                 | Deletion 11q                  | 56/628 (8.92%)                          | 0/10 (0%)                            | 1       |
|                                                 | Deletion 17p/ <i>TP53</i> mut | 50/630 (7.9%)                           | 0/10 (0%)                            | 1       |
| Patients treated during follow-up <sup>c</sup>  | n (%)                         | 338 (51.5)                              | 12 (100)                             | <0.001  |
| Patients deceased during follow-up <sup>d</sup> | n (%)                         | 177 (27)                                | 4 (33.3)                             | 0.734   |

IGHV unmutated,  $\geq 98\%$  identity with germ line.

<sup>a</sup>P value of the comparison between the number of patients at Binet A vs Binet B/C in both subgroups.

<sup>b</sup>P value of the comparison between the number of mutated and unmutated IGHV patients in both subgroups.

<sup>c</sup>P value of the comparison of the cumulative incidence curves of TTFT by Gray's test.

<sup>d</sup>P value of the comparison of the survival curves by log-rank test.

**Supplemental Table 5:** Fine-Gray multivariate regression model after Backward-stepwise elimination for time to-first treatment designed to test the independent prognostic value of *RPS15* mutations.

| Variable                             | Hazard ratio (95% CI) | P-value |
|--------------------------------------|-----------------------|---------|
| Binet stage (B/C vs. A)              | 5.06 (3.83-6.69)      | < 0.001 |
| IGHV (unmutated vs. mutated)         | 3.20 (2.42-4.24)      | < 0.001 |
| <i>RPS15</i> (mutated vs. unmutated) | 1.77 (1.29-2.43)      | < 0.001 |

Starting model: IGHV (unmutated vs. mutated), Binet stage (B/C vs. A), *RPS15* mutations (mutated at any VAF vs. unmutated), trisomy 12 (presence vs. absence), deletion 13q (presence vs. absence), deletion 11q (presence vs. absence), and deletion 17q and/or *TP53* mutation (presence vs. absence). CI, confidence interval.



**Supplemental Table 6:** *RPS15* mutations in other tumor types as annotated in COSMIC and c-Bioportal.

| Position | Mutation | Exon | Cancer type     | Counts | Frequency (%) | Database          |
|----------|----------|------|-----------------|--------|---------------|-------------------|
| 6        | p.Q6H    | 2    | Thyroid         | 1      | 0.13          | COSMIC            |
| 8        | p.K8del  | 2    | Stomach         | 1      | 0.21          | c-BioPortal       |
| 15       | p.F15L   | 2    | Adrenal gland   | 1      | 0.16          | COSMIC            |
| 36       | p.L36M   | 3    | Thyroid         | 1      | 0.13          | COSMIC            |
| 39       | p.A39E   | 3    | Pancreas        | 1      | 0.06          | COSMIC            |
| 44       | p.R44P   | 3    | Prostate        | 1      | 0.06          | COSMIC-cBioPortal |
| 44       | p.R44L   | 3    | Large intestine | 1      | 0.06          | COSMIC            |
| 47       | p.R47P   | 3    | Melanoma        | 1      | 2.56          | c-BioPortal       |
| 51       | p.R51W   | 3    | Endometrium     | 1      | 0.15          | COSMIC            |
| 53       | p.Q53K   | 3    | Thyroid         | 1      | 0.13          | COSMIC            |
| 55       | p.S55C   | 3    | Breast          | 1      | 0.12          | c-BioPortal       |
| 64       | p.K64N   | 3    | Head and neck   | 1      | 0.19          | c-BioPortal       |
| 67       | p.A67V   | 3    | Large intestine | 1      | 0.06          | COSMIC            |
| 79       | p.H79Y   | 3    | Large intestine | 1      | 0.06          | COSMIC            |
| 81       | p.R81Q   | 3    | Lung            | 1      | 0.05          | COSMIC-cBioPortal |
| 81       | p.R81W   | 3    | Large intestine | 1      | 0.06          | COSMIC            |
| 82       | p.D82E   | 3    | Liver           | 1      | 0.05          | COSMIC            |
| 92       | p.S92I   | 3    | Endometrium     | 1      | 0.15          | COSMIC            |
| 95       | p.G95D   | 3    | Liver           | 1      | 0.05          | COSMIC            |
| 99       | p.G99R   | 3    | Breast          | 1      | 0.12          | c-BioPortal       |
| 104      | p.Q104*  | 3    | Head and neck   | 1      | 0.08          | COSMIC            |
| 117      | p.G117D  | 4    | Large intestine | 1      | 0.06          | COSMIC            |
| 123      | p.Y123H  | 4    | Thyroid         | 1      | 0.13          | COSMIC            |
| 144      | p.L144F  | 4    | Melanoma        | 1      | 0.08          | COSMIC            |

**Supplemental Table 7:** Significantly enriched (FDR<0.25) gene sets identified by GSEA analysis of proteomic data from GFP-RPS15<sup>P131S</sup>-expressing HEK293T cells. Red, positively-correlated enriched gene sets (16). Blue, negatively-correlated enriched gene sets (24).

| Gene Set                                                                         | Size | ES     | NES    | NOM P-value | FDR Q-value | FWER P-value | Rank at Max |
|----------------------------------------------------------------------------------|------|--------|--------|-------------|-------------|--------------|-------------|
| REACTOME DNA STRAND ELONGATION                                                   | 29   | 0.575  | 1.944  | 0           | 0.113       | 0.087        | 1981        |
| REACTOME KINESINS                                                                | 18   | 0.642  | 1.941  | 0.002       | 0.057       | 0.088        | 805         |
| REACTOME MUSCLE CONTRACTION                                                      | 21   | 0.600  | 1.869  | 0           | 0.075       | 0.166        | 1598        |
| REACTOME SMOOTH MUSCLE CONTRACTION                                               | 15   | 0.680  | 1.859  | 0.006       | 0.065       | 0.186        | 1598        |
| REACTOME SEMA4D INDUCED CELL MIGRATION AND GROWTH CONE COLLAPSE                  | 18   | 0.609  | 1.841  | 0           | 0.062       | 0.223        | 1598        |
| REACTOME MITOTIC G1 G1 S PHASES                                                  | 107  | 0.411  | 1.826  | 0           | 0.060       | 0.256        | 1242        |
| REACTOME ASSEMBLY OF THE PRE REPLICATIVE COMPLEX                                 | 56   | 0.458  | 1.801  | 0           | 0.066       | 0.323        | 1198        |
| REACTOME SEMAPHORIN INTERACTIONS                                                 | 40   | 0.481  | 1.724  | 0.007       | 0.120       | 0.544        | 1598        |
| REACTOME ACTIVATION OF ATR IN RESPONSE TO REPLICATION STRESS                     | 34   | 0.486  | 1.718  | 0.007       | 0.111       | 0.555        | 1927        |
| REACTOME M G1 TRANSITION                                                         | 70   | 0.417  | 1.676  | 0           | 0.140       | 0.667        | 1242        |
| REACTOME TRANSCRIPTION COUPLED NER TC NER                                        | 37   | 0.463  | 1.669  | 0.006       | 0.136       | 0.690        | 2353        |
| REACTOME G1 S TRANSITION                                                         | 92   | 0.382  | 1.642  | 0           | 0.158       | 0.781        | 1242        |
| REACTOME FACTORS INVOLVED IN MEGAKARYOCYTE DEVELOPMENT AND PLATELET PRODUCTION   | 68   | 0.401  | 1.639  | 0           | 0.149       | 0.790        | 1072        |
| REACTOME MITOTIC M G1 PHASES                                                     | 145  | 0.349  | 1.604  | 0.002       | 0.183       | 0.871        | 1311        |
| REACTOME DNA REPLICATION                                                         | 161  | 0.343  | 1.590  | 0           | 0.191       | 0.906        | 1311        |
| REACTOME ORC1 REMOVAL FROM CHROMATIN                                             | 57   | 0.399  | 1.580  | 0.007       | 0.192       | 0.927        | 1198        |
| REACTOME NONSENSE MEDIATED DECAY ENHANCED BY THE EXON JUNCTION COMPLEX           | 92   | -0.380 | -1.582 | 0.007       | 0.090       | 0.929        | 2293        |
| REACTOME INFLUENZA LIFE CYCLE                                                    | 121  | -0.374 | -1.622 | 0.002       | 0.067       | 0.869        | 2293        |
| REACTOME MITOCHONDRIAL PROTEIN IMPORT                                            | 31   | -0.498 | -1.637 | 0.009       | 0.061       | 0.835        | 1699        |
| REACTOME TCA CYCLE AND RESPIRATORY ELECTRON TRANSPORT                            | 81   | -0.404 | -1.643 | 0.005       | 0.060       | 0.807        | 2250        |
| REACTOME TRANSMEMBRANE TRANSPORT OF SMALL MOLECULES                              | 119  | -0.379 | -1.644 | 0.002       | 0.062       | 0.801        | 1223        |
| REACTOME SIGNALING BY HIPPO                                                      | 16   | -0.595 | -1.692 | 0.008       | 0.045       | 0.656        | 124         |
| REACTOME METABOLISM OF PROTEINS                                                  | 265  | -0.356 | -1.726 | 0           | 0.037       | 0.552        | 2293        |
| REACTOME TRANSLATION                                                             | 127  | -0.395 | -1.730 | 0           | 0.038       | 0.539        | 2586        |
| REACTOME CYTOSOLIC TRNA AMINOACYLATION                                           | 24   | -0.558 | -1.733 | 0.004       | 0.039       | 0.522        | 2300        |
| REACTOME ASSOCIATION OF TRIC CCT WITH TARGET PROTEINS DURING BIOSYNTHESIS        | 20   | -0.585 | -1.740 | 0.008       | 0.040       | 0.504        | 955         |
| REACTOME FORMATION OF TUBULIN FOLDING INTERMEDIATES BY CCT TRIC                  | 15   | -0.633 | -1.758 | 0.006       | 0.035       | 0.432        | 532         |
| REACTOME INFLUENZA VIRAL RNA TRANSCRIPTION AND REPLICATION                       | 88   | -0.433 | -1.759 | 0           | 0.037       | 0.428        | 2293        |
| REACTOME PEPTIDE CHAIN ELONGATION                                                | 74   | -0.473 | -1.867 | 0           | 0.011       | 0.143        | 2586        |
| REACTOME ACTIVATION OF THE MRNA UPON BINDING OF THE CAP BINDING COMPLEX AND EIFS | 51   | -0.512 | -1.868 | 0.002       | 0.012       | 0.141        | 2586        |
| REACTOME SRP DEPENDENT COTRANSLATIONAL PROTEIN TARGETING TO MEMBRANE             | 91   | -0.459 | -1.902 | 0           | 0.009       | 0.099        | 2293        |
| REACTOME PURINE METABOLISM                                                       | 24   | -0.624 | -1.930 | 0           | 0.006       | 0.068        | 2022        |
| REACTOME TRNA AMINOACYLATION                                                     | 38   | -0.542 | -1.934 | 0           | 0.007       | 0.063        | 2300        |
| REACTOME TRANSPORT OF INORGANIC CATIONS ANIONS AND AMINO ACIDS OLIGOPEPTIDES     | 25   | -0.618 | -1.945 | 0.002       | 0.007       | 0.056        | 1067        |
| REACTOME CITRIC ACID CYCLE TCA CYCLE                                             | 17   | -0.685 | -1.980 | 0           | 0.004       | 0.027        | 1075        |
| REACTOME 3 UTR MEDIATED TRANSLATIONAL REGULATION                                 | 94   | -0.485 | -2.004 | 0           | 0.004       | 0.024        | 2586        |
| REACTOME SLC MEDIATED TRANSMEMBRANE TRANSPORT                                    | 62   | -0.525 | -2.038 | 0           | 0.002       | 0.010        | 1085        |
| REACTOME FORMATION OF THE TERNARY COMPLEX AND SUBSEQUENTLY THE 43S COMPLEX       | 43   | -0.583 | -2.064 | 0           | 0.002       | 0.007        | 2586        |
| REACTOME BRANCHED CHAIN AMINO ACID CATABOLISM                                    | 16   | -0.730 | -2.073 | 0           | 0.003       | 0.007        | 970         |
| REACTOME PYRUVATE METABOLISM AND CITRIC ACID TCA CYCLE                           | 32   | -0.638 | -2.112 | 0           | 0.002       | 0.002        | 2048        |

**Supplemental Table 8:** Significantly enriched (FDR<0.25) gene sets identified by GSEA analysis of proteomic data from GFP-RPS15<sup>S138F</sup>-expressing HEK293T cells. Red, positively-correlated enriched gene sets (14). Blue, negatively-correlated enriched gene sets (12).

| Gene Set                                                                          | Size | ES     | NES    | NOM P-value | FDR Q-value | FWER P-value | Rank at Max |
|-----------------------------------------------------------------------------------|------|--------|--------|-------------|-------------|--------------|-------------|
| REACTOME DESTABILIZATION OF MRNA BY KSRP                                          | 16   | 0.740  | 2.109  | 0           | 0.010       | 0.010        | 863         |
| REACTOME 3 UTR MEDIATED TRANSLATIONAL REGULATION                                  | 94   | 0.480  | 2.034  | 0           | 0.009       | 0.017        | 2682        |
| REACTOME PEPTIDE CHAIN ELONGATION                                                 | 74   | 0.476  | 1.930  | 0           | 0.029       | 0.083        | 2682        |
| REACTOME TRANSPORT OF INORGANIC CATIONS ANIONS AND AMINO ACIDS OLIGOPEPTIDES      | 25   | 0.606  | 1.919  | 0           | 0.024       | 0.090        | 1024        |
| REACTOME DESTABILIZATION OF MRNA BY TRISTETRAPROLIN TTP                           | 16   | 0.674  | 1.885  | 0           | 0.028       | 0.129        | 1548        |
| REACTOME ACTIVATION OF GENES BY ATF4                                              | 17   | 0.644  | 1.843  | 0.002       | 0.039       | 0.204        | 1082        |
| REACTOME SLC MEDIATED TRANSMEMBRANE TRANSPORT                                     | 62   | 0.464  | 1.825  | 0           | 0.040       | 0.235        | 1752        |
| REACTOME NONSENSE MEDIATED DECAY ENHANCED BY THE EXON JUNCTION COMPLEX            | 92   | 0.432  | 1.813  | 0           | 0.038       | 0.254        | 2682        |
| REACTOME TRANSPORT OF RIBONUCLEOPROTEINS INTO THE HOST NUCLEUS                    | 27   | 0.539  | 1.772  | 0.004       | 0.050       | 0.358        | 2012        |
| REACTOME DESTABILIZATION OF MRNA BY BRF1                                          | 17   | 0.608  | 1.770  | 0           | 0.047       | 0.367        | 863         |
| REACTOME GLUCOSE TRANSPORT                                                        | 27   | 0.528  | 1.754  | 0.005       | 0.046       | 0.412        | 2012        |
| REACTOME TRANSPORT OF MATURE MRNA DERIVED FROM AN INTRONLESS TRANSCRIPT           | 32   | 0.516  | 1.751  | 0           | 0.044       | 0.426        | 2012        |
| REACTOME PI3K AKT ACTIVATION                                                      | 22   | 0.559  | 1.691  | 0.005       | 0.056       | 0.599        | 1402        |
| REACTOME CYTOSOLIC TRNA AMINOACYLATION                                            | 24   | 0.527  | 1.667  | 0.009       | 0.063       | 0.683        | 1968        |
| REACTOME TRANS GOLGI NETWORK VESICLE BUDDING                                      | 52   | -0.482 | -1.697 | 0           | 0.086       | 0.697        | 67          |
| REACTOME RESPIRATORY ELECTRON TRANSPORT                                           | 42   | -0.510 | -1.719 | 0.008       | 0.076       | 0.618        | 1885        |
| REACTOME ANTIGEN PRESENTATION FOLDING ASSEMBLY AND PEPTIDE LOADING OF CLASS I MHC | 16   | -0.658 | -1.752 | 0.004       | 0.060       | 0.492        | 1419        |
| REACTOME BRANCHED CHAIN AMINO ACID CATABOLISM                                     | 16   | -0.649 | -1.825 | 0           | 0.032       | 0.259        | 1501        |
| REACTOME RESPIRATORY ELECTRON TRANSPORT ATP SYNTHESIS BY CHEMIOSMOTIC COUPLING    | 51   | -0.541 | -1.901 | 0           | 0.013       | 0.098        | 1287        |
| REACTOME INTERFERON GAMMA SIGNALING                                               | 21   | -0.695 | -1.996 | 0.002       | 0.003       | 0.022        | 780         |
| REACTOME MITOCHONDRIAL PROTEIN IMPORT                                             | 31   | -0.625 | -2.017 | 0           | 0.003       | 0.016        | 1202        |
| REACTOME LYSOSOME VESICLE BIOGENESIS                                              | 20   | -0.713 | -2.056 | 0           | 0.001       | 0.006        | 363         |
| REACTOME CHONDROITIN SULFATE DERMATAN SULFATE METABOLISM                          | 16   | -0.761 | -2.066 | 0           | 0.001       | 0.003        | 1296        |
| REACTOME PYRUVATE METABOLISM AND CITRIC ACID TCA CYCLE                            | 32   | -0.675 | -2.172 | 0           | 0.000       | 0.000        | 858         |
| REACTOME CITRIC ACID CYCLE TCA CYCLE                                              | 17   | -0.790 | -2.197 | 0           | 0.000       | 0.000        | 858         |
| REACTOME TCA CYCLE AND RESPIRATORY ELECTRON TRANSPORT                             | 81   | -0.576 | -2.209 | 0           | 0.000       | 0.000        | 1551        |

**Supplemental Table 9:** Significantly enriched (FDR<0.25) gene sets identified by GSEA analysis of proteomic data from GFP-RPS15<sup>MUT</sup>-expressing MEC1 cells. Red, positively-correlated enriched gene sets (27). Blue, negatively-correlated enriched gene sets (14).

| Gene Set                                                                                                                  | Size | ES     | NES    | NOM P-value | FDR Q-value | FWER P-value | Rank at Max |
|---------------------------------------------------------------------------------------------------------------------------|------|--------|--------|-------------|-------------|--------------|-------------|
| REACTOME NONSENSE MEDIATED DECAY ENHANCED BY THE EXON JUNCTION COMPLEX                                                    | 94   | 0.553  | 2.317  | 0           | 0.000       | 0.000        | 1660        |
| REACTOME 3 UTR MEDIATED TRANSLATIONAL REGULATION                                                                          | 96   | 0.549  | 2.281  | 0           | 0.000       | 0.000        | 1660        |
| REACTOME PEPTIDE CHAIN ELONGATION                                                                                         | 76   | 0.554  | 2.242  | 0           | 0.000       | 0.001        | 2296        |
| REACTOME INFLUENZA VIRAL RNA TRANSCRIPTION AND REPLICATION                                                                | 90   | 0.536  | 2.221  | 0           | 0.000       | 0.001        | 2187        |
| REACTOME INFLUENZA LIFE CYCLE                                                                                             | 123  | 0.462  | 2.020  | 0           | 0.005       | 0.020        | 1660        |
| REACTOME METABOLISM OF RNA                                                                                                | 231  | 0.416  | 1.986  | 0           | 0.009       | 0.043        | 1788        |
| REACTOME APOPTOTIC EXECUTION PHASE                                                                                        | 36   | 0.569  | 1.962  | 0           | 0.011       | 0.061        | 1372        |
| REACTOME ACTIVATION OF THE MRNA UPON BINDING OF THE CAP BINDING COMPLEX AND EIFS AND SUBSEQUENT BINDING TO 43S            | 54   | 0.510  | 1.949  | 0           | 0.011       | 0.071        | 1559        |
| REACTOME METABOLISM OF MRNA                                                                                               | 189  | 0.420  | 1.934  | 0           | 0.013       | 0.087        | 1695        |
| REACTOME LATENT INFECTION OF HOMO SAPIENS WITH MYCOBACTERIUM TUBERCULOSIS                                                 | 15   | 0.706  | 1.931  | 0.002       | 0.012       | 0.089        | 659         |
| REACTOME FORMATION OF THE TERNARY COMPLEX AND SUBSEQUENTLY THE 43S COMPLEX                                                | 46   | 0.520  | 1.898  | 0.002       | 0.015       | 0.123        | 1559        |
| REACTOME DEPOSITION OF NEW CENPA CONTAINING NUCLEOSOMES AT THE CENTROMERE                                                 | 18   | 0.646  | 1.879  | 0.002       | 0.017       | 0.150        | 596         |
| REACTOME APOPTOTIC CLEAVAGE OF CELLULAR PROTEINS                                                                          | 25   | 0.578  | 1.829  | 0.002       | 0.026       | 0.233        | 1299        |
| REACTOME TRANSLATION                                                                                                      | 130  | 0.417  | 1.823  | 0           | 0.026       | 0.243        | 1677        |
| REACTOME FORMATION OF TUBULIN FOLDING INTERMEDIATES BY CCT TRIC                                                           | 17   | 0.636  | 1.784  | 0.004       | 0.034       | 0.347        | 1797        |
| REACTOME MEIOTIC RECOMBINATION                                                                                            | 22   | 0.580  | 1.784  | 0.008       | 0.036       | 0.345        | 372         |
| REACTOME PREFOLDIN MEDIATED TRANSFER OF SUBSTRATE TO CCT TRIC                                                             | 23   | 0.572  | 1.782  | 0.004       | 0.032       | 0.356        | 1332        |
| REACTOME RNA POL I TRANSCRIPTION                                                                                          | 24   | 0.571  | 1.770  | 0           | 0.032       | 0.407        | 1123        |
| REACTOME TELOMERE MAINTENANCE                                                                                             | 34   | 0.521  | 1.770  | 0.002       | 0.034       | 0.404        | 1294        |
| REACTOME ACTIVATION OF THE PRE REPLICATIVE COMPLEX                                                                        | 22   | 0.566  | 1.752  | 0.006       | 0.036       | 0.459        | 1604        |
| REACTOME DNA STRAND ELONGATION                                                                                            | 28   | 0.513  | 1.700  | 0.004       | 0.052       | 0.614        | 1604        |
| REACTOME SRP DEPENDENT COTRANSLATIONAL PROTEIN TARGETING TO MEMBRANE                                                      | 94   | 0.400  | 1.689  | 0           | 0.051       | 0.650        | 1677        |
| REACTOME CHROMOSOME MAINTENANCE                                                                                           | 63   | 0.425  | 1.662  | 0.002       | 0.063       | 0.734        | 1755        |
| REACTOME ANTIVIRAL MECHANISM BY IFN STIMULATED GENES                                                                      | 61   | 0.422  | 1.600  | 0.004       | 0.097       | 0.879        | 1240        |
| REACTOME MITOTIC M M G1 PHASES                                                                                            | 139  | 0.348  | 1.542  | 0           | 0.140       | 0.960        | 1788        |
| REACTOME CELL CYCLE                                                                                                       | 286  | 0.313  | 1.527  | 0           | 0.144       | 0.980        | 1796        |
| REACTOME CELL CYCLE MITOTIC                                                                                               | 246  | 0.305  | 1.460  | 0           | 0.197       | 0.994        | 1537        |
| REACTOME POST TRANSLATIONAL PROTEIN MODIFICATION                                                                          | 77   | -0.383 | -1.538 | 0.01        | 0.170       | 0.973        | 1622        |
| REACTOME METABOLISM OF AMINO ACIDS AND DERIVATIVES                                                                        | 115  | -0.387 | -1.653 | 0           | 0.082       | 0.753        | 1007        |
| REACTOME RESPIRATORY ELECTRON TRANSPORT                                                                                   | 56   | -0.446 | -1.664 | 0.004       | 0.080       | 0.725        | 2078        |
| REACTOME RESPIRATORY ELECTRON TRANSPORT ATP SYNTHESIS BY CHEMIOSMOTIC COUPLING AND HEAT PRODUCTION BY UNCOUPLING PROTEINS | 67   | -0.444 | -1.740 | 0           | 0.041       | 0.451        | 1894        |
| REACTOME ANTIGEN PRESENTATION FOLDING ASSEMBLY AND PEPTIDE LOADING OF CLASS I MHC                                         | 19   | -0.608 | -1.775 | 0.002       | 0.033       | 0.359        | 2101        |
| REACTOME FATTY ACID TRIACYLGLYCEROL AND KETONE BODY METABOLISM                                                            | 94   | -0.443 | -1.823 | 0           | 0.021       | 0.231        | 1465        |
| REACTOME PHOSPHOLIPID METABOLISM                                                                                          | 91   | -0.460 | -1.885 | 0           | 0.012       | 0.129        | 934         |
| REACTOME METABOLISM OF LIPIDS AND LIPOPROTEINS                                                                            | 220  | -0.407 | -1.898 | 0           | 0.012       | 0.113        | 646         |
| REACTOME PYRUVATE METABOLISM AND CITRIC ACID TCA CYCLE                                                                    | 34   | -0.588 | -1.968 | 0           | 0.006       | 0.045        | 1107        |
| REACTOME TCA CYCLE AND RESPIRATORY ELECTRON TRANSPORT                                                                     | 97   | -0.476 | -1.971 | 0           | 0.006       | 0.042        | 1660        |
| REACTOME CHOLESTEROL BIOSYNTHESIS                                                                                         | 17   | -0.747 | -2.088 | 0           | 0.002       | 0.009        | 622         |
| REACTOME CITRIC ACID CYCLE TCA CYCLE                                                                                      | 19   | -0.756 | -2.207 | 0           | 0.000       | 0.000        | 968         |
| REACTOME GLYCEROPHOSPHOLIPID BIOSYNTHESIS                                                                                 | 28   | -0.699 | -2.224 | 0           | 0.000       | 0.000        | 730         |
| REACTOME TRIGLYCERIDE BIOSYNTHESIS                                                                                        | 22   | -0.758 | -2.321 | 0           | 0.000       | 0.000        | 588         |

## Supplemental Figure 1

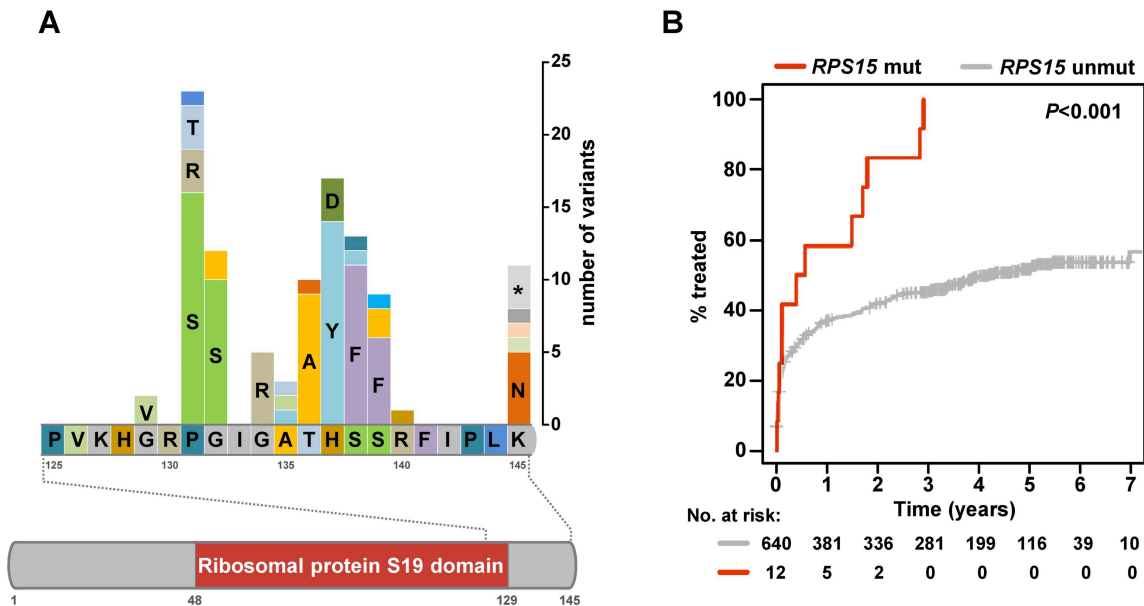

**Supplemental Figure 1. Distribution and clinical impact of the C-terminal mutations in RPS15.** (A) Schematic representation of RPS15 protein and number and distribution of somatic RPS15 mutations identified in CLL-WES and -WGS studies. Most of the mutations (~85%) clustered to a small C-terminal segment of 9 amino acids (positions 131 to 139). Color-coding indicates the type of amino acid change. \*, premature stop codon. (B) Comparison of time to first treatment among CLL patients (Puente et al. 2015 and validation cohorts) harboring an unmutated RPS15 (gray line) vs patients with mutated RPS15 (orange line). P, P-values by Gray's test.

## Supplemental Figure 2

A

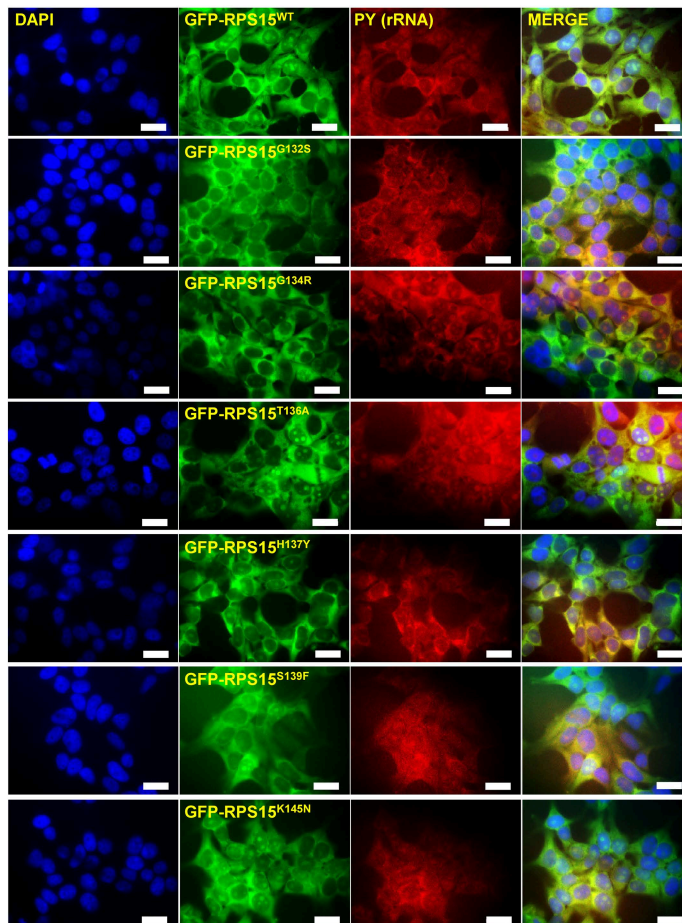

B

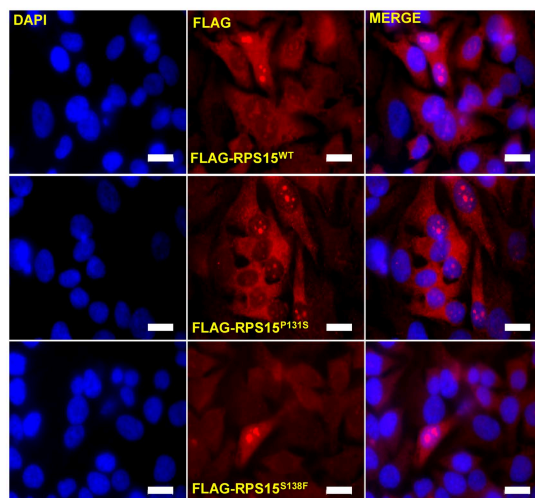

**Supplemental Figure 2. RPS15 recurrent mutations do not alter subcellular distribution on protein.** (A) Distribution of RPS15 proteins (wild-type and G132S, G134R, T136A, H137Y, S139F and K145N mutants) fused to GFP in HEK293T cells. rRNA distribution was stained with the RNA-binding dye Pyronin Y (PY). Co-localization is shown in merge panels. Scale bar, 20  $\mu$ m. (B) Immunofluorescence analysis of FLAG-tagged RPS15<sup>WT</sup>, RPS15<sup>P131S</sup> and RPS15<sup>S138F</sup> mutants in HeLa cells. Both mutants (FLAG-RPS15<sup>P131S</sup> and FLAG-RPS15<sup>S138F</sup>) show the same distribution than FLAG-RPS15<sup>WT</sup>. DAPI staining show nuclei. Scale bar, 20 $\mu$ m.

## Supplemental Figure 3

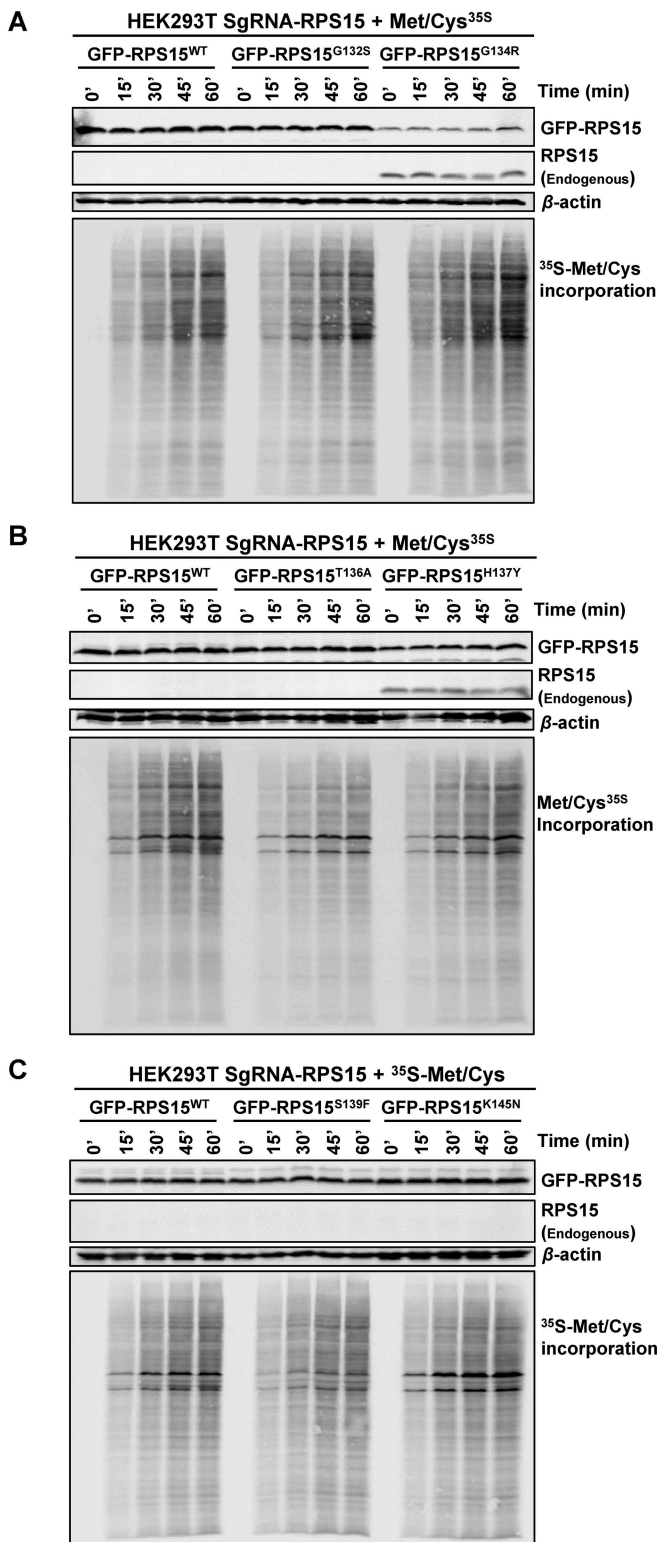

**Supplemental figure 3. De novo protein synthesis measured by <sup>35</sup>S-Met/Cys incorporation in different GFP-RPS15 mutants.** (A) Comparative analysis between GFP-RPS15<sup>WT</sup>, GFP-RPS15<sup>G132S</sup> and GFP-RPS15<sup>G134R</sup>. (B) Comparative analysis between GFP-RPS15<sup>WT</sup>, GFP-RPS15<sup>T136A</sup> and GFP-RPS15<sup>H137Y</sup>. (C) Comparative analysis between GFP-RPS15<sup>WT</sup>, GFP-RPS15<sup>S139F</sup> and GFP-RPS15<sup>K145N</sup>. (A-C) A representative autoradiography image and the associated RPS15 and  $\beta$ -actin immunoblots are shown of 3 independent experiments. Western blot against  $\beta$ -actin was used as loading control.

# Supplemental Figure 4

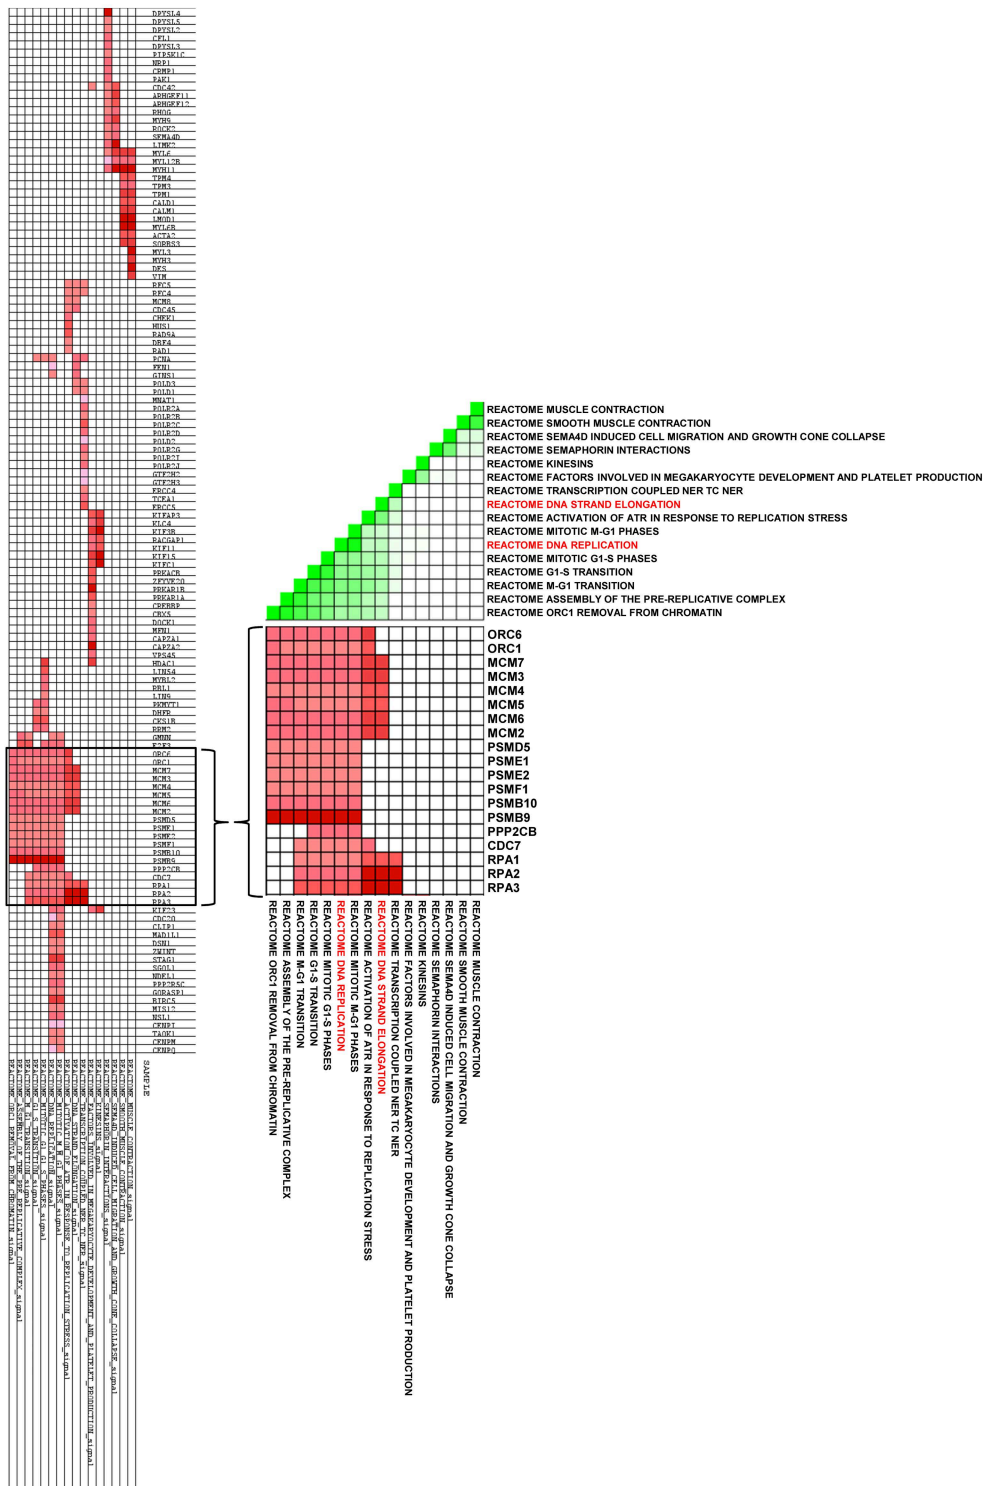

**Supplemental Figure 4. Leading edge analysis of positively-correlated enriched gene sets for GFP-RPS15<sup>P131S</sup> phenotype identifies DNA replication and DNA strand elongation as the main biological signature up-regulated in HEK293T cells. Significantly enriched gene sets at nominal  $P < 0.01$  and FDR  $< 0.25$  (left) shared several components of the DNA replication machinery, coloured in red (right, magnified box).**



# Supplemental Figure 5

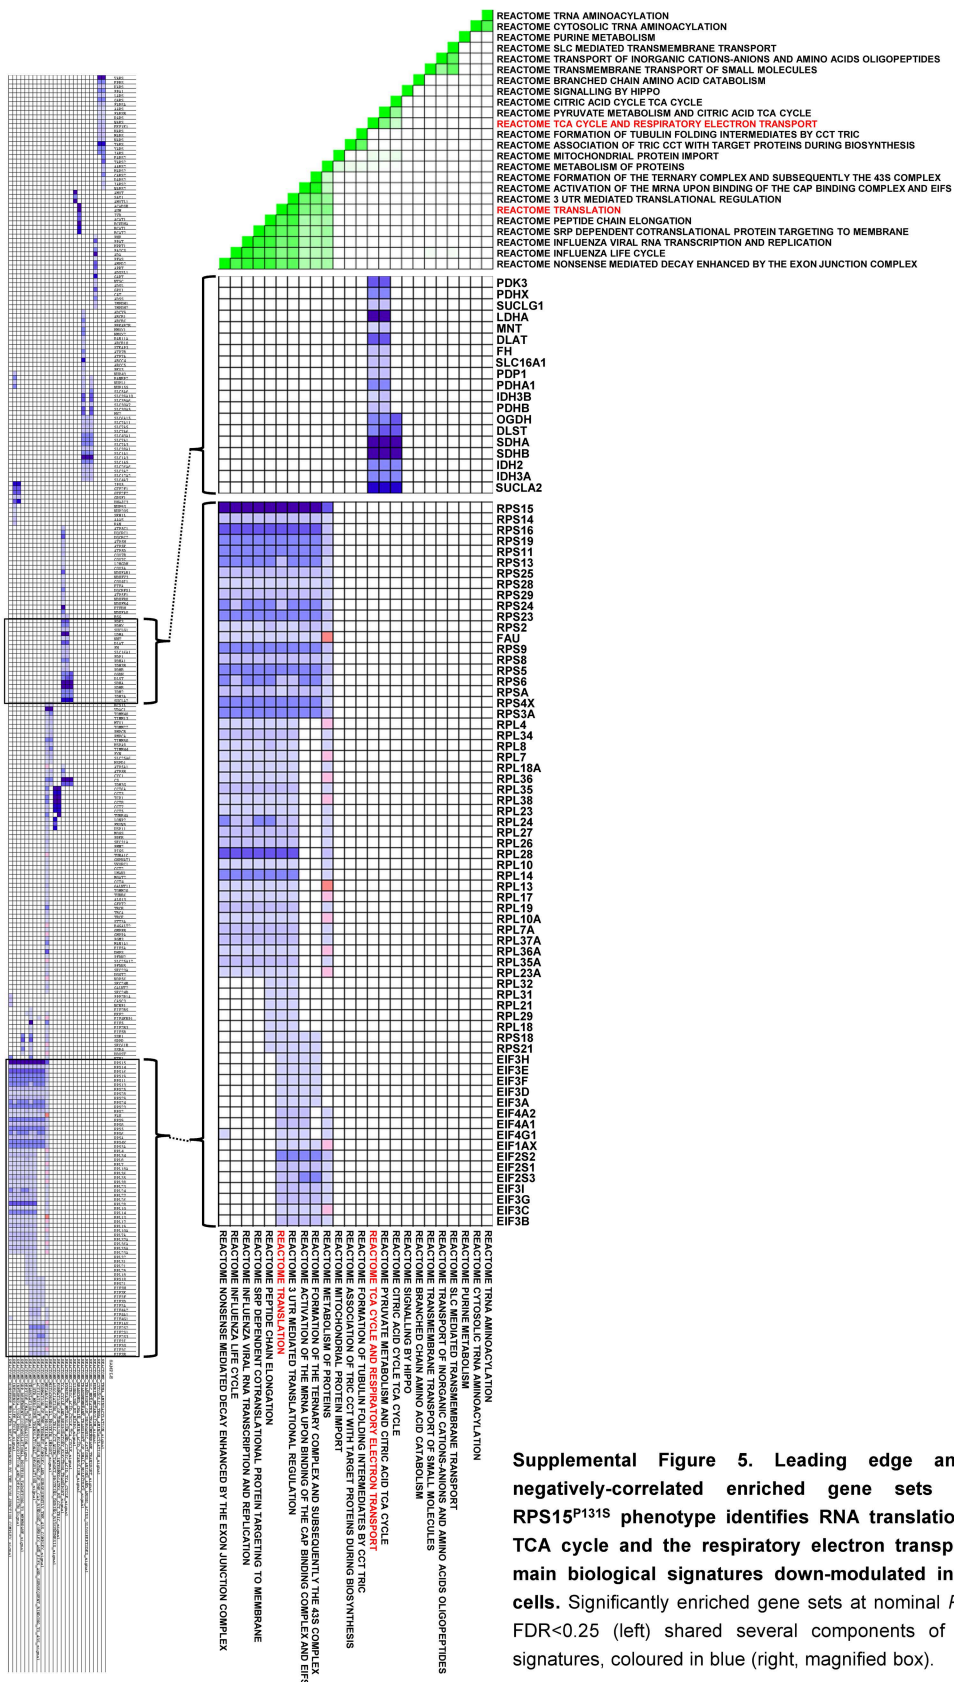

**Supplemental Figure 5. Leading edge analysis of negatively-correlated enriched gene sets for GFP-RPS15<sup>P131S</sup> phenotype identifies RNA translation and the TCA cycle and the respiratory electron transport as the main biological signatures down-modulated in HEK293T cells. Significantly enriched gene sets at nominal  $P < 0.01$  and FDR  $< 0.25$  (left) shared several components of these two signatures, coloured in blue (right, magnified box).**

# Supplemental Figure 6

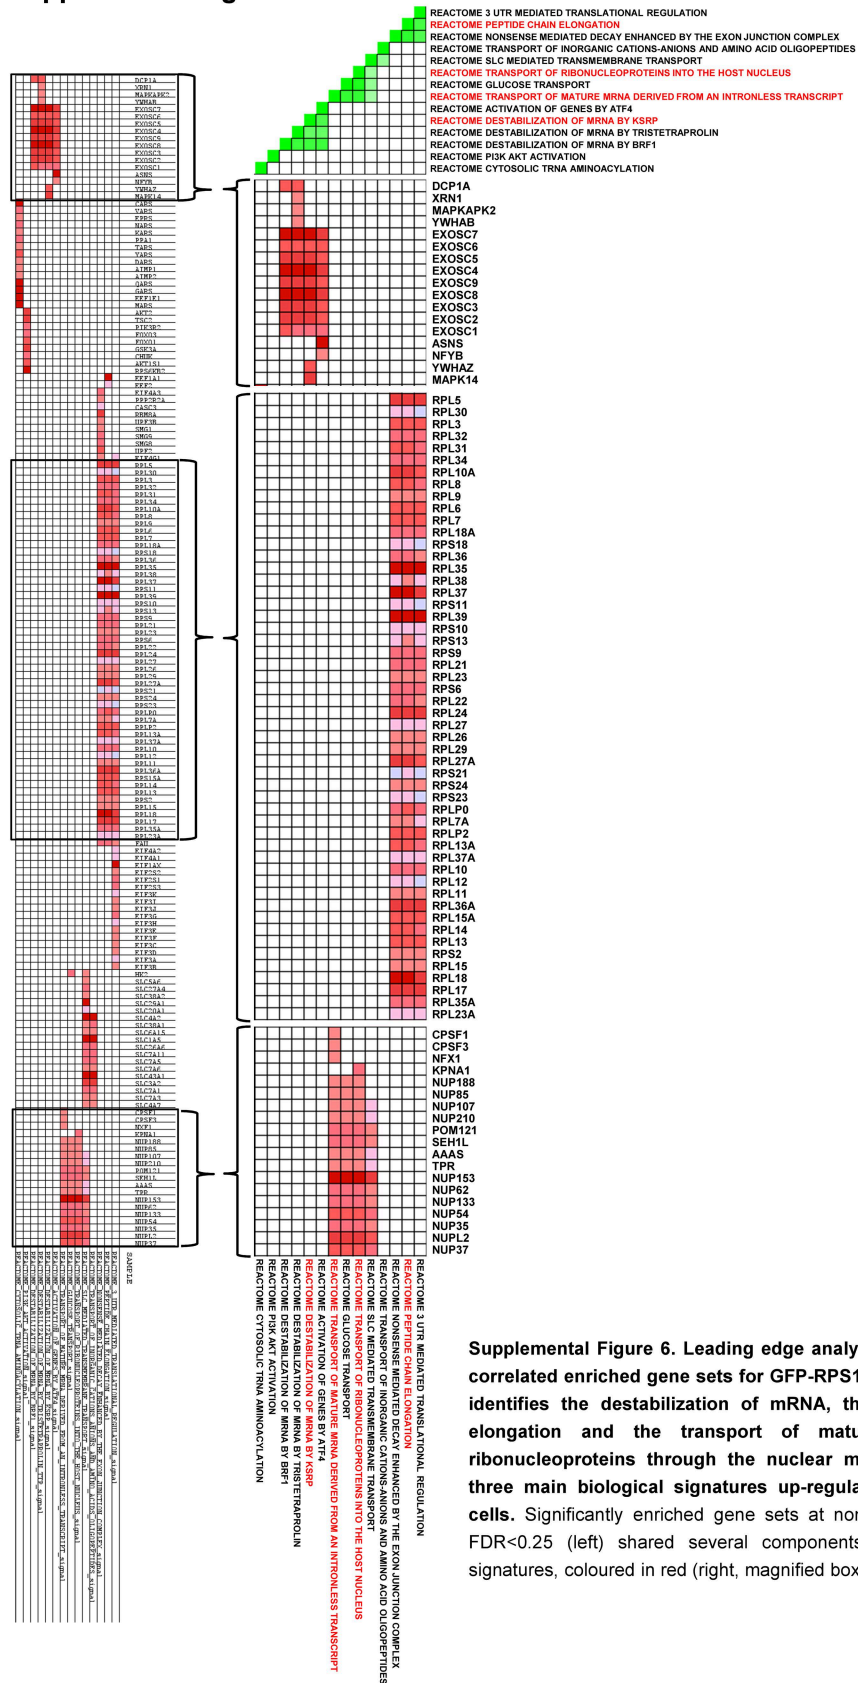

Supplemental Figure 6. Leading edge analysis of positively-correlated enriched gene sets for GFP-RPS15<sup>S138F</sup> phenotype identifies the destabilization of mRNA, the peptide chain elongation and the transport of mature mRNA and ribonucleoproteins through the nuclear membrane as the three main biological signatures up-regulated in HEK293T cells. Significantly enriched gene sets at nominal  $P < 0.01$  and  $FDR < 0.25$  (left) shared several components of these three signatures, coloured in red (right, magnified boxes).

# Supplemental Figure 7

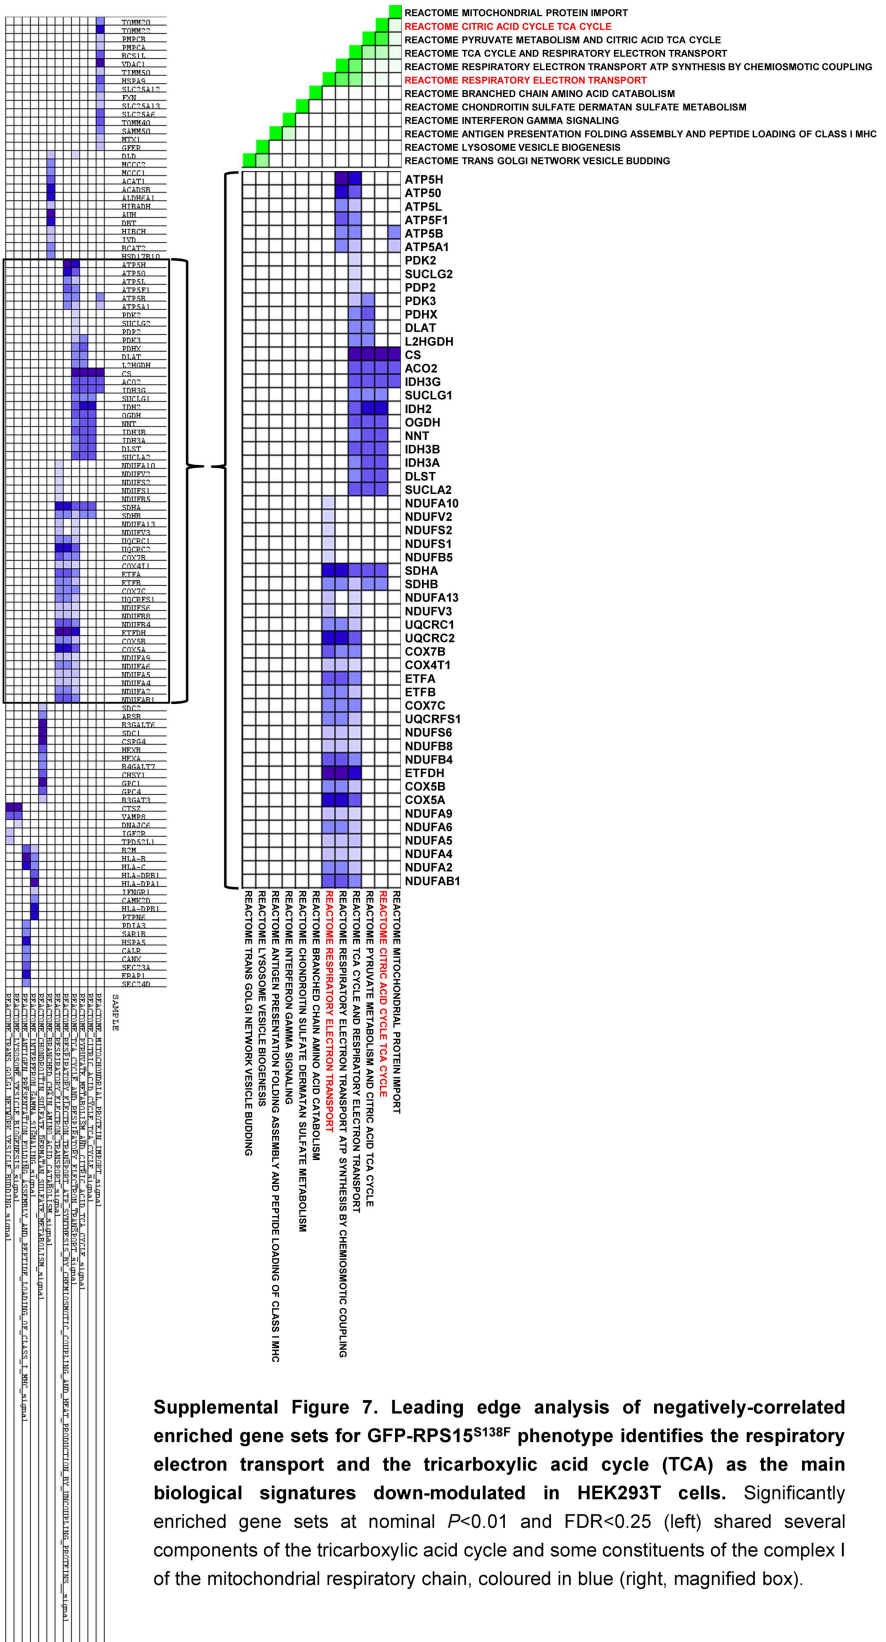

## Supplemental Figure 8

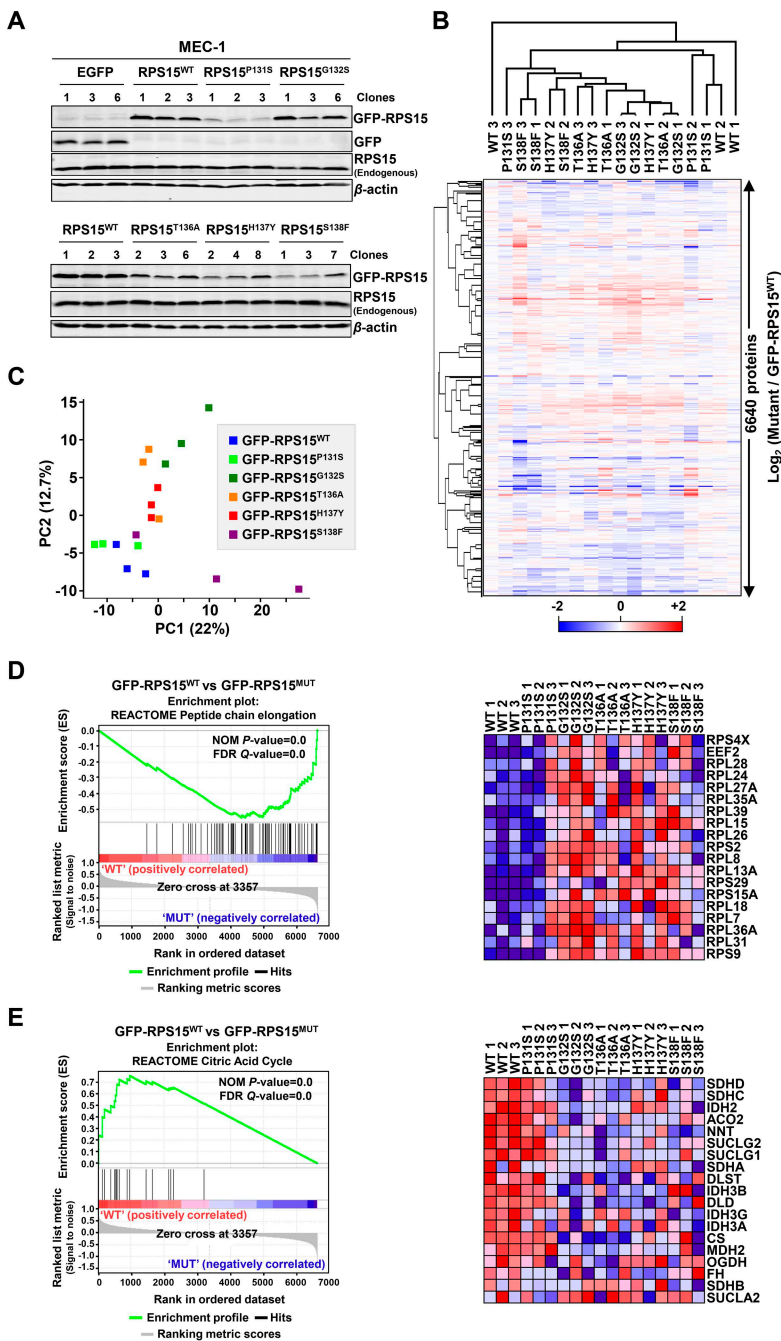

**Supplemental Figure 8. RPS15 mutant proteins alter global cell proteome in MEC-1 cells.** (A) MEC-1 cells stably expressing the different RPS15 constructs (WT, P131S, G132S, T136A, H137Y and S138F) used for the proteomic analysis. Selected subclones were subjected to western blot analysis with antibodies against GFP, RPS15 and  $\beta$ -actin as loading control. (B) Heat-map depicting unsupervised hierarchical clustering of the 18 proteomes analyzed using the total set of proteins identified. Protein abundance is shown as the Log<sub>2</sub> ratio between each sample with respect to the average of reference sample (GFP-RPS15<sup>WT</sup>-expressing MEC-1 cells). (C) Principal component analysis of the relative protein abundances of all 18 proteomes analyzed. (D-E) Comparison of proteomic profiles from GFP-RPS15<sup>WT</sup> versus GFP-RPS15<sup>MUT</sup>-expressing MEC-1 cells performed through GSEA. (D) The enrichment plot shown corresponds to peptide chain elongation in the REACTOME database. Right, Heat-map showing the 19 top genes of the GFP-RPS15<sup>WT</sup> negatively-correlated enriched gene set. (E) The enrichment score plot shown corresponds to citric acid cycle in the REACTOME database. Right, heat-map showing the 19 top genes of the GFP-RPS15<sup>WT</sup> positively-correlated enriched gene set.

# Supplemental Figure 9

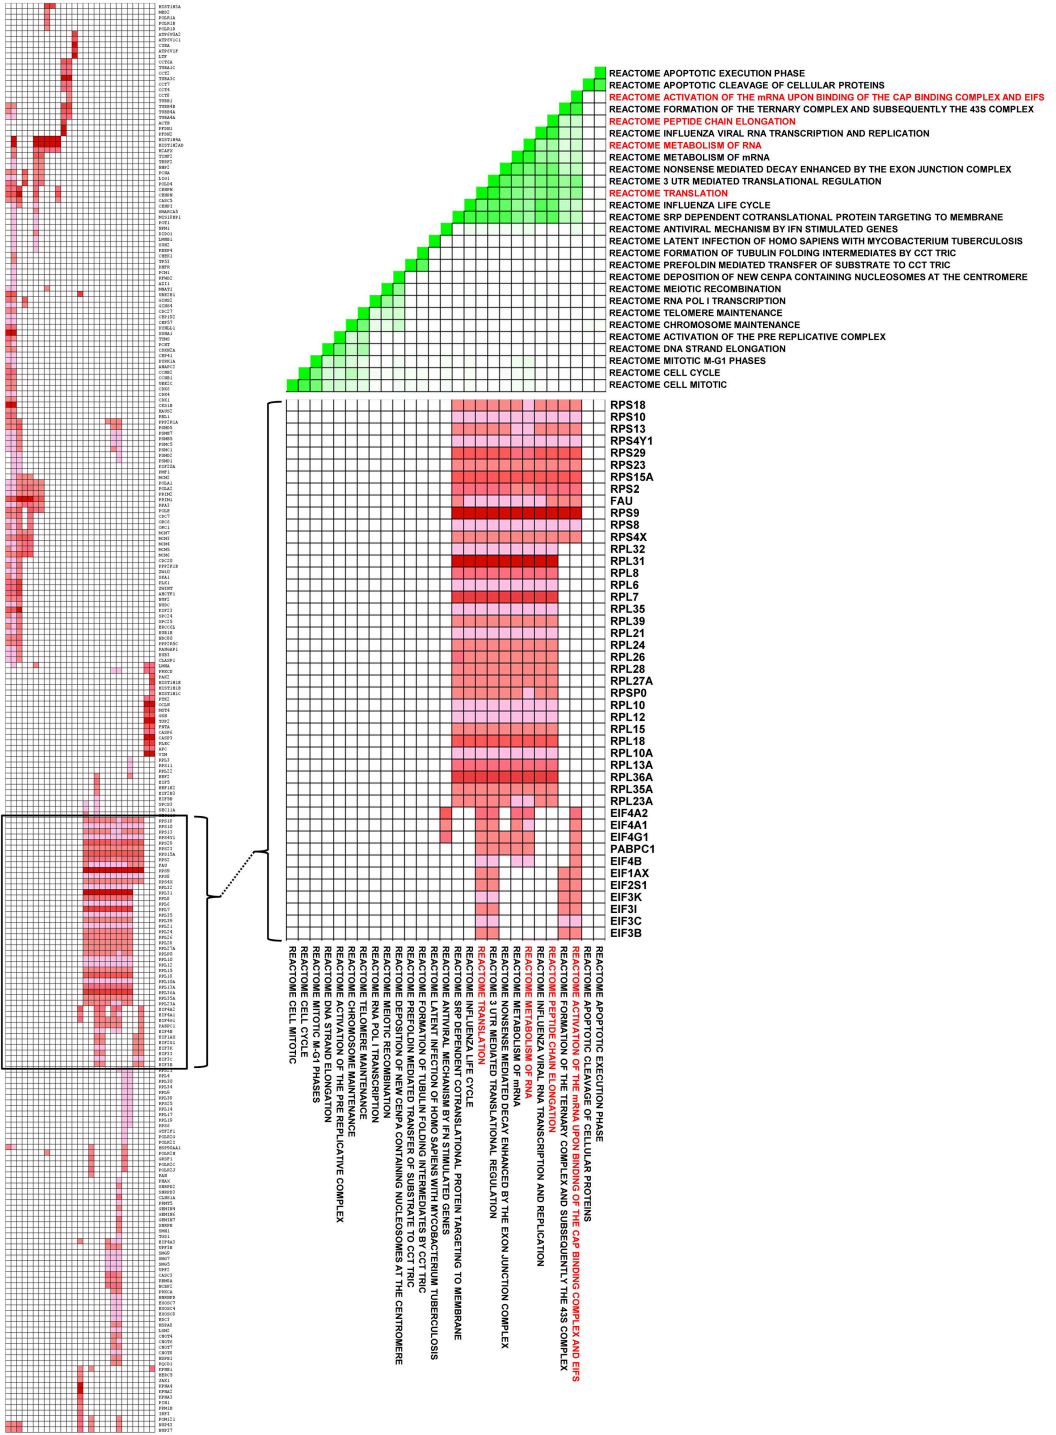

**Supplemental Figure 9. Leading edge analysis of positively-correlated enriched gene sets for GFP-RPS15<sup>MUT</sup> phenotype identifies RNA translation as the main biological signature up-regulated in MEC-1 cells.** Significantly enriched gene sets at nominal  $P < 0.01$  and  $FDR < 0.25$  (left) shared several components of the ribosomal 40S and 60S subunits and some eukaryotic initiation factors, coloured in red (right, magnified box).

# Supplemental Figure 10

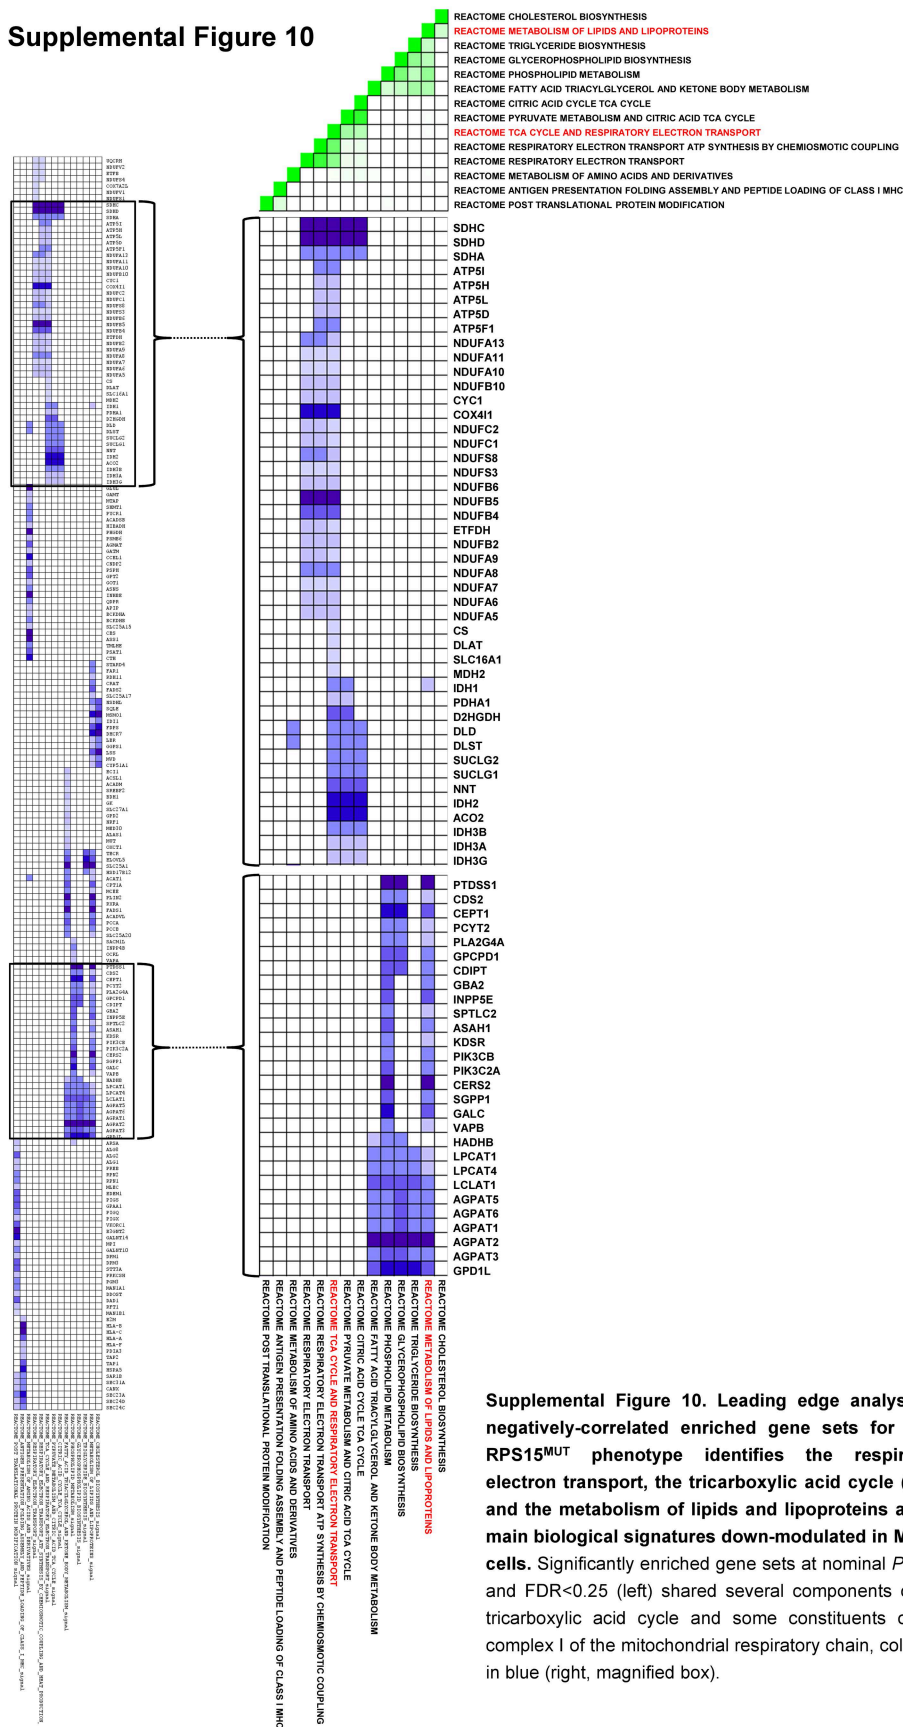

**Supplemental Figure 10. Leading edge analysis of negatively-correlated gene sets for GFP-RPS15<sup>MUT</sup> phenotype identifies the respiratory electron transport, the tricarboxylic acid cycle (TCA) and the metabolism of lipids and lipoproteins as the main biological signatures down-modulated in MEC-1 cells. Significantly enriched gene sets at nominal  $P < 0.01$  and  $FDR < 0.25$  (left) shared several components of the tricarboxylic acid cycle and some constituents of the complex I of the mitochondrial respiratory chain, coloured in blue (right, magnified box).**
